# Supplementary material for: Urinary incontinence in older men: protocol for a scoping review of risk factors
Source: PubMed Central journal article supplement — BMJ Open. 2023 Feb 10;13(2):e068956. doi: 10.1136/bmjopen-2022-068956 (PMC9923276; doi:10.1136/bmjopen-2022-068956), 2023-02-10
Supplement: bmjopen-2022-068956.draft_revisions.pdf [file bmjopen-2022-068956.draft_revisions.pdf]

# BMJ Open

BMJ Open is committed to open peer review. As part of this commitment we make the peer review history of every article we publish publicly available.

When an article is published we post the peer reviewers' comments and the authors' responses online. We also post the versions of the paper that were used during peer review. These are the versions that the peer review comments apply to.

The versions of the paper that follow are the versions that were submitted during the peer review process. They are not the versions of record or the final published versions. They should not be cited or distributed as the published version of this manuscript.

BMJ Open is an open access journal and the full, final, typeset and author-corrected version of record of the manuscript is available on our site with no access controls, subscription charges or pay-per-view fees (<http://bmjopen.bmj.com>).

If you have any questions on BMJ Open's open peer review process please email [info.bmjopen@bmj.com](mailto:info.bmjopen@bmj.com)

# BMJ Open

## URINARY INCONTINENCE IN OLDER MEN: PROTOCOL FOR A SCOPING REVIEW OF RISK FACTORS

|                               |                                                                                                                                                                                                                                                                                                                                            |
|-------------------------------|--------------------------------------------------------------------------------------------------------------------------------------------------------------------------------------------------------------------------------------------------------------------------------------------------------------------------------------------|
| Journal:                      | <i>BMJ Open</i>                                                                                                                                                                                                                                                                                                                            |
| Manuscript ID                 | bmjopen-2022-068956                                                                                                                                                                                                                                                                                                                        |
| Article Type:                 | Protocol                                                                                                                                                                                                                                                                                                                                   |
| Date Submitted by the Author: | 07-Oct-2022                                                                                                                                                                                                                                                                                                                                |
| Complete List of Authors:     | Olagundoye, Olawunmi; University of Alberta Faculty of Medicine & Dentistry, Medicine<br>Kung, Janice ; University of Alberta, John W. Scott Health Sciences Library<br>Gibson, W.; University of Alberta Faculty of Medicine and Dentistry, Division of Geriatric Medicine<br>Wagg, Adrian; University of Alberta, Department of Medicine |
| Keywords:                     | GERIATRIC MEDICINE, Urinary incontinences < UROLOGY, EPIDEMIOLOGY                                                                                                                                                                                                                                                                          |
|                               |                                                                                                                                                                                                                                                                                                                                            |

SCHOLARONE™  
Manuscripts

**TITLE PAGE**

**Protocol title:** Urinary incontinence in older men: protocol for a scoping review of risk factors

**Authors:**

Olawunmi Olagundoye

Janice Kung

William Gibson

Adrian Wagg

**Corresponding author:** Olawunmi Olagundoye

Postal address: College of Health Sciences, Faculty of Medicine & Dentistry

Department of Medicine, Division of Geriatric Medicine

1-198 Clinical Sciences Building 11350 – 83 Ave

Edmonton, AB, Canada T6G 2G3

Telephone number: +1 780.492.5338

Fax number: 780.492.2874

Email address: [olagundo@ualberta.ca](mailto:olagundo@ualberta.ca)

**Co-authors' affiliations:**

Janice Kung, University of Alberta, Edmonton, Canada

William Gibson, University of Alberta, Edmonton, Canada

Adrian Wagg, University of Alberta, Edmonton, Canada

**Keywords:**

urinary incontinence; older men; overactive bladder; risk factors; geriatrics

**Word count:** 2033

## URINARY INCONTINENCE IN OLDER MEN: PROTOCOL FOR A SCOPING REVIEW OF RISK FACTORS

### ABSTRACT

**Introduction:** Urinary Incontinence (UI) is common among older men. Epidemiological studies have established the risk factors for UI but are not always specific to men aged 65 and above. The literature is yet to be systematically and comprehensively reviewed to identify UI risk factors specific to these men. Such evidence is required for the development of evidence-based interventions. This scoping review will synthesize evidence regarding UI risk factors in older men.

**Methods and analysis:** The Joanna Briggs Institute (JBI) method for scoping reviews will guide the conduct of this scoping review and its reporting alongside the Preferred Reporting Items for Systematic Reviews and Meta-analyses extension for scoping reviews (PRISMA-ScR) checklist. JBI's Population, Concept, and Context (PCC) framework is used to frame inclusion criteria, and JBI's scoping review protocol template is used to format this protocol. Our comprehensive search will include Ovid MEDLINE, Ovid Embase, CINAHL, Scopus, Web of Science Core Collection, Cochrane Library (via Wiley), and ProQuest Dissertations & Theses Global. There will be no language restriction since approximately 10% of preliminary search results were in languages other than English (LOTE). Study type or publication date will not be restricted. Besides databases, we will review Google Scholar results and bibliographies. Two independent reviewers will screen, select, and extract eligible studies. A preliminary search strategy and data extraction template are in the appendix. A qualitative and quantitative analysis of data will be performed as a means of describing the risk factors for UI identified among older men by using frequencies and descriptive methods.

**Ethics and dissemination:** The review does not require ethics approval. Findings will be disseminated at conferences, in a peer-reviewed journal and used to inform the development of an evidence-based tool for self-management of UI in older men.

**Registration:** The protocol is registered in the Open Science Framework [<https://osf.io/xsrge/>].

### Strengths and limitations of the proposed study

- In this review, evidence on UI risk factors will be mapped and synthesized in a systematic and comprehensive way, focusing specifically on older men.
- Cost-effective prevention and treatment programs aimed at older men will be informed by an understanding of UI risk factors.
- It will identify knowledge gaps associated with UI risk factors among older men, thereby highlighting future research directions.
- In order to map out the evidence base, the review will not include a quality appraisal of individual sources of evidence, regardless of their level on the hierarchy of evidence. This is in accordance with the JBI's scoping review method.

## INTRODUCTION

The International Continence Society defines urinary incontinence (UI) as the complaint of any involuntary leakage of urine.[1] UI comes with huge costs to individuals, employers, and the health care system in Canada, estimated at \$8.5 billion annually in 2014,[2] and \$65.9 billion in the United States in 2007.[3] For the majority of sufferers, UI is a chronic stigmatizing condition that is under-reported and under-treated.[2] UI is under-prioritized and under-researched, particularly in older men (defined here as men 65+), and there have been calls for more targeted research focusing on this specific group.[4,5]

The prevalence of male UI is higher among older than younger men, reaching 30% compared to 10% and 16% in younger and middle-aged men from a Canadian Bladder survey.[6] In the United States, UI prevalence increases with age from 11% among men 60 to 64 years old to 31% among men 85 years and above.[7] According to evidence gathered from studies conducted in over 20 countries across the continents, the prevalence of UI was 4.81% to 32.17% among community-dwelling men and 21% to 32% among older men.[8] The Sixth International Consultation on Incontinence notes that the epidemiology of male UI has received less attention compared to female UI, and that UI prevalence seems to rise more steadily with advancing age in males than in females.[5] The prevalence of Urgency Urinary Incontinence is similar in both men and women and increases in association with increasing age.[9]

Although the overall prevalence of UI in older men is about half that of older women,[5] the consequences of UI in older men are equally far-reaching, affecting their quality of life, levels of physical activity, and economic productivity, posing significant physical, psychological, social, sexual, and financial burdens.[10] Similar to the experiences of older women, UI in older men increases the risks of institutionalization,[8] self-isolation, and depression.[2]

Much of the limited research on male UI has focused on its prevalence [6,8,11] and associated risk factors in general [8,11,12].

Most UI epidemiological studies have not systematically identified risk factors for UI in older men and have not sought to categorize them. Although age groups were not specified, the Sixth International Consultation on Incontinence documents some established risk factors predisposing men in general to UI including "increasing age, presence of LUTS, urinary tract infections, functional and cognitive impairment, diabetes, alcohol intake, neurological disorders, and prostatectomy." [5]

Given the financial burden of UI, an understanding of risk factors can inform cost-effective prevention and treatment programs such as self-management; a promising and proven intervention for managing chronic conditions like UI.[13] Evidence about factors amenable to modification will allow the development of evidence-based interventions for self-management of UI in older men, a strategy found to be effective in older women.[14,15]

1  
2  
3 So far, self-management intervention packages for men have targeted uncomplicated lower urinary tract  
4 symptoms (LUTS) generally and mostly in men with prostate disease (Benign Prostatic Hyperplasia  
5 [BPH]/Benign Prostatic Enlargement [BPE]). These packages vary in their components, recommendations,  
6 and outcomes.[16–18] The inconsistencies and heterogeneity of these recommendations, the lack of clarity  
7 as to what should constitute the optimal package of components for self-management,[27] and the need to  
8 focus specifically on the population of older men with UI [4] necessitate a comprehensive mapping of the  
9 full breadth of evidence through a scoping review of risk factors for UI in older men.  
10  
11  
12  
13

14 As part of a larger study, this scoping review aims to synthesize evidence on risk factors as the starting  
15 point in the creation of a self-management intervention targeting older men. The findings from this scoping  
16 review will inform a formal process to define and prioritize risk factors amenable to self-management that  
17 older male patients find practicable and are potentially willing to modify.  
18  
19  
20

21 The objective of this scoping review therefore is to identify risk factors for UI in older men.  
22  
23

24 We found no current or ongoing review on our topic after a preliminary search of MEDLINE, PubMed, the  
25 Cochrane Database of Systematic Reviews, and *JB* Evidence Synthesis. In addition, inquiries to subject  
26 matter experts at the 2022 International Continence Society's scientific conference revealed that our topic  
27 was not currently under review.  
28  
29  
30

### 31 **Review question**

32

33 What are the risk factors for urinary incontinence in older men?  
34  
35

### 36 **Eligibility criteria**

37

#### 38 *Participants*

39  
40

41 Our review will include sources of evidence identifying the risk factors among older men (65+) with UI. We  
42 will exclude data solely from men aged < 65 years of age.  
43  
44

#### 45 *Concepts*

46  
47

48 Urinary incontinence is a storage symptom of the lower urinary tract defined as the complaint of any  
49 involuntary loss/leakage of urine.[1] UI can be classified as reversible or established. Reversible UI has a  
50 treatable cause and is more common among hospitalized older patients, and residents in long-term care  
51 [19] while established UI is chronic, and it may not be possible to identify a reversible cause. The five major  
52 types of established UI are urgency, stress (exertional), overflow, functional (disability associated), and  
53 mixed urinary incontinence.[20]  
54  
55  
56  
57  
58  
59  
60

1  
2  
3 Risk factors are characteristics, conditions, behaviours or exposures that increase the likelihood of getting  
4 a disease or injury.[21] There are general risk factors that may apply to chronic diseases in general (tobacco  
5 use, alcohol consumption, physical inactivity, excess weight, and poor nutrition)[22] as well as specific risk  
6 factors for UI. They also include those characteristics or conditions that increase the possibility of getting a  
7 disease or injury.[21] Generally, risk factors can be grouped into categories: *Behavioural risk factors* relate  
8 to the actions that individuals have chosen to take, and can be eliminated or modified through lifestyle or  
9 behavioural changes. Examples include tobacco smoking, excessive alcohol use, poor nutrition, and  
10 physical inactivity.[21] *Physiological risk factors* are those relating to an individual's body. They may be  
11 influenced by an interaction of genetics, lifestyle, and other broad factors. Examples include overweight or  
12 obesity, high blood pressure, high blood cholesterol, and high blood sugar. *Demographic risk factors* relate  
13 to the overall population. Examples are age, occupation, religion, or income. *Environmental risk factors*  
14 cover a wide range of topics such as social, economic, cultural, political, physical, chemical, and biological  
15 factors. Examples include air pollution, workplace risks, access to clean water and sanitation, and social  
16 interactions. *Genetic risk factors* are based on an individual's genetic make-up. While some diseases are  
17 mainly genetic, others reflect an interaction between genetic and environmental factors.[21]  
18  
19  
20  
21  
22  
23  
24  
25

### 26 *Context*

27  
28 All settings for older men with UI.  
29  
30

### 31 *Types of sources*

32  
33 All study designs will be included in this scoping review without restriction. It will consider published and  
34 unpublished sources. Text, opinion papers, and other grey literature will also be considered for  
35 inclusion.[23]  
36  
37  
38

## 39 **METHODS AND ANALYSIS**

40  
41 We will conduct our scoping review following the Joanna Briggs Institute (JBI) method for scoping  
42 review,[23] and in line with the Preferred Reporting Items for Systematic Reviews and Meta-analyses  
43 extension for scoping reviews (PRISMA-ScR) checklist.[24]  
44  
45  
46

### 47 **Search strategy**

48  
49 The search strategy will aim to locate both published and unpublished studies. A librarian scientist (JK)  
50 performed an initial search of MEDLINE to identify articles on the topic. The text words contained in the  
51 titles and abstracts of relevant articles, and the index terms used to describe the articles were used to  
52 develop a full search strategy for Ovid MEDLINE (Appendix I). The search strategy, including all identified  
53 keywords and index terms, will be adapted for each included database or information source. This strategy  
54  
55  
56  
57  
58  
59  
60



1  
2  
3 will be reviewed by other members of the research team and if necessary, by a second librarian scientist  
4 using the Peer Review of Electronic Search Strategies (PRESS) guideline.[25]  
5  
6

7 Studies published in any language will be included. We will compare translations from two validated online  
8 language translators; DeepL translator and Google translator (<https://www.deepl.com/en/translator> and  
9 <https://translate.google.com/>) for LOTE and double-check with colleagues who are known native speakers  
10 of the LOTE when necessary. Relevant studies published since the inception of the databases to date will  
11 be included. In addition to subscription databases, the research team will review the first 200 results from  
12 Google Scholar for inclusion. This is a reasonable number of results to screen since there is a high overlap  
13 between Web of Science and Google Scholar.[26] The reference list of all included sources of evidence will  
14 be screened for additional studies.  
15  
16  
17  
18

19  
20 The databases to be searched are Ovid MEDLINE, Ovid Embase, CINAHL, Scopus, Web of Science Core  
21 Collection, Cochrane Library (via Wiley), and ProQuest Dissertations & Theses Global. Sources of  
22 unpublished studies/ grey literature include (conference proceedings, information from government health  
23 agencies, academic institutions, and professional societies). Grey literature consists of unpublished  
24 literature, including publicly available information produced by all levels of government, academic  
25 institutions, business, and industry, in print and electronic formats, which is not controlled by commercial  
26 publishers.[27] We will use general and targeted internet searches for the electronic formats of these  
27 documents. General searches will involve the use of Google, while targeted searches will examine the  
28 websites of national and international organizations addressing the subject matter.  
29  
30  
31  
32  
33

### 34 **Study/Source of Evidence selection**

35  
36 All identified citations from the search will be collated and uploaded into Covidence (Veritas Health  
37 Innovation Ltd, Melbourne); a web-based collaboration software platform that streamlines the production of  
38 systematic and other literature reviews.[28] After automatic removal of duplicates, two reviewers will  
39 independently screen titles and abstracts of a random sample of 5% of studies identified with our literature  
40 search. They will discuss the results and review the eligibility criteria as needed. We will check the inter-  
41 reviewer agreement for inclusion or exclusion between these reviewers using the kappa statistics.[29] A  
42 Cohen kappa coefficient ( $\kappa$  value) of 0.41-0.60 indicates moderate agreement, 0.61-0.80 indicates  
43 substantial agreement, and 0.81-1.00 is almost perfect agreement.[29]  $\kappa$  value  $>0.61$  will be considered  
44 sufficient to proceed.  
45  
46  
47  
48  
49

50 Potential reasons for exclusion will be defined a priori, categorized, recorded, and reported in the scoping  
51 review. The full text of included citations will then be assessed in detail against the inclusion criteria by two  
52 independent reviewers. Any disagreements that arise during the selection process will be resolved through  
53 discussion and consensus between reviewers, and if needed, with a third party.[23] The results of the  
54  
55  
56  
57  
58  
59  
60

1  
2  
3 search and the study inclusion process will be reported in full and presented in a Preferred Reporting Items  
4 for Systematic Reviews and Meta-analyses extension for scoping review (PRISMA-ScR) flow diagram.[24]  
5  
6

### 7 **Data Extraction**

8  
9 Data will be extracted from papers using a data extraction tool developed by the reviewers. The data  
10 extracted will include specific details about the country, authors, participants, concept, context, study  
11 methods, and key findings relevant to the review question.  
12  
13

14  
15 A draft extraction form is provided (Appendix II).[30] Two reviewers will pilot test the draft extraction form  
16 through a calibration exercise to guide the selection of evidence sources to ensure the form captures all  
17 relevant data. They will then extract data independently from included studies into the draft. The draft data  
18 extraction tool will be modified and revised as necessary. Any modifications will be detailed in the scoping  
19 review. Any disagreements that arise between the reviewers will be resolved through discussion, or with  
20 an additional reviewer. If appropriate, authors of papers will be contacted to request missing or additional  
21 data where required.  
22  
23  
24  
25

### 26 **Risk of bias**

27  
28 In accordance with JBI method for scoping reviews, no quality appraisal will be conducted.[23] Rather than  
29 engaging in formal quality assessments, we will assign a level of evidence rating to each study based on  
30 JBI's well-established categorization of studies.  
31  
32  
33

### 34 **Data Analysis and Presentation**

35  
36 We will summarize data quantitatively (using frequencies) and qualitatively (using the descriptive-analytical  
37 method). If possible, we will stratify results by the economic status of the country (e.g., low-, middle-, or  
38 high-income country), ethnicity/race, and health context (e.g., primary care, secondary, and tertiary care).  
39 Data will be presented in diagrammatic or tabular form. A narrative summary will accompany the tables and  
40 charts and will describe how the results relate to the review objective and question.  
41  
42  
43  
44

### 45 **Patient and public involvement**

46  
47 It might not be appropriate or possible to involve patients or the public in the design, conduct, reporting  
48 and dissemination plans of our review. However, a patient advisory group will be involved in translating  
49 evidence from the review into co-creating a patient-centered tool for self-management of UI in the context  
50 of a larger study.  
51  
52  
53  
54  
55  
56  
57  
58  
59  
60

### **Ethics and dissemination**

The review does not require ethics approval. Findings will be disseminated through presentations at conferences/workshops, peer-reviewed publication, health blogs, and other social media platforms such as LinkedIn, Twitter, and Instagram.

### **Copyright/license for publication**

"The Corresponding Author has the right to grant on behalf of all authors and does grant on behalf of all authors, a worldwide licence to the Publishers and its licensees in perpetuity, in all forms, formats and media (whether known now or created in the future), to i) publish, reproduce, distribute, display and store the Contribution, ii) translate the Contribution into other languages, create adaptations, reprints, include within collections and create summaries, extracts and/or, abstracts of the Contribution, iii) create any other derivative work(s) based on the Contribution, iv) to exploit all subsidiary rights in the Contribution, v) the inclusion of electronic links from the Contribution to third party material where-ever it may be located; and, vi) licence any third party to do any or all of the above."

**Acknowledgement:** This review contributes towards a PhD degree award for OO.

**Authors' contributions:** OO and AW contributed to the conceptualization, design, literature search, manuscript writing and manuscript editing. JK developed the search strategy, conducted the searches, and contributed to manuscript writing. WG contributed to the literature search, manuscript review and editing. All authors approved the final manuscript.

**Funding statement:** The review has received no specific grant from any funding agency in the public, commercial or not-for-profit sectors.

**Competing interest statement:** The authors have no competing interests to declare.

**Patient consent for publication:** Not required.

**REFERENCES**

1. D'Ancona C, Haylen B, Oelke M, Abranches-Monteiro L, Arnold E, Goldman H, et al. The International Continence Society (ICS) report on the terminology for adult male lower urinary tract and pelvic floor symptoms and dysfunction. *Neurourol Urodyn*. 2019;38(2):433–77.
2. The Canadian Continence Foundation. The Impact of Incontinence in Canada. A briefing document for policy makers [Internet]. 2014. Available from: <https://www.canadiancontinence.ca/pdfs/en-impact-of-incontinence-in-canada-2014.pdf>
3. Coyne KS, Wein A, Nicholson S, Kvasz M, Chen CI, Milsom I. Economic burden of urgency urinary incontinence in the United States: a systematic review. *J Manag Care Pharm JMCP*. 2014;20(2):130–40.
4. Wagg A. Male Overactive Bladder: Underappreciated, Under-researched. More Please? *Eur Urol*. 2021;79(4):505–6.
5. Abrams P, Cardozo L, Wagg A, Wein A. (Eds). *Incontinence*. Vol. 1. Bristol UK: ICI-ICS. International Continence Society; 2017. 35–36 p.
6. Herschorn S, Gajewski J, Schulz J, Corcos J. A population-based study of urinary symptoms and incontinence: the Canadian Urinary Bladder Survey. *BJU Int*. 2007;22(5):52–8.
7. Anger JT, Saigal CS, Stothers L, Thom DH, Rodríguez LV, Litwin MS, et al. The prevalence of urinary incontinence among community dwelling men: results from the National Health and Nutrition Examination survey. *J Urol*. 2006;176(5):2103–8; discussion 2108.
8. Shamliyan TA, Wyman JF, Ping R, Wilt TJ, Kane RL. Male urinary incontinence: prevalence, risk factors, and preventive interventions. *Rev Urol*. 2009;11(3):145–65.
9. Irwin DE, Milsom I, Hunskaar S, Reilly K, Kopp Z, Herschorn S, et al. Population-based survey of urinary incontinence, overactive bladder, and other lower urinary tract symptoms in five countries: results of the EPIC study. *Eur Urol*. 2006;50(6):1306–14; discussion 1314-1315.
10. Chung E, Katz DJ, Love C. Adult male stress and urge urinary incontinence - A review of pathophysiology and treatment strategies for voiding dysfunction in men. *Aust Fam Physician*. 2017;46(9):661–6.

- 1  
2  
3 11. Abrams P, Cardozo L, Khoury S, Wein A, editors. INCONTINENCE [Internet]. 5th ed. 2013. Available  
4 from: [https://www.ics.org/Publications/ICI\\_5/INCONTINENCE.pdf](https://www.ics.org/Publications/ICI_5/INCONTINENCE.pdf)  
5
- 6  
7 12. Fernández-Cuadros ME, Nieto-Blasco J, Geanini-Yagüez A, Ciprián-Nieto D, Padilla-Fernández B,  
8 Lorenzo-Gómez MF. Male Urinary Incontinence: Associated Risk Factors and Electromyography  
9 Biofeedback Results in Quality of Life. *Am J Mens Health*. 2016;10(6):NP127–35.  
10
- 11  
12 13. Grady PA, Gough LL. Self-management: a comprehensive approach to management of chronic  
13 conditions. *Am J Public Health*. 2014;104(8):e25-31.  
14
- 15  
16 14. Tannenbaum C, van den Heuvel E, Fritel X, Southall K, Jutai J, Rajabali S, et al. Continence Across  
17 Continents To Upend Stigma and Dependency (CACTUS-D): study protocol for a cluster  
18 randomized controlled trial. *Trials*. 2015;16(1):565.  
19
- 20  
21 15. Holroyd-Leduc JM, Straus S, Thorpe K, Davis DA, Schmaltz H, Tannenbaum C. Translation of  
22 evidence into a self-management tool for use by women with urinary incontinence†. *Age Ageing*.  
23 2011;40(2):227–33.  
24
- 25  
26 16. Albarqouni L, Sanders S, Clark J, Tikkinen KAO, Glasziou P. Self-Management for Men With Lower  
27 Urinary Tract Symptoms: A Systematic Review and Meta-Analysis. *Ann Fam Med*.  
28 2021;19(2):157–67.  
29
- 30  
31 17. Brown CT, Yap T, Cromwell DA, Rixon L, Steed L, Mulligan K, et al. Self management for men with  
32 lower urinary tract symptoms: randomised controlled trial. *BMJ*. 2007 6;334(7583):25.  
33
- 34  
35 18. Brown CT, van der Meulen J, Mundy AR, O’Flynn E, Emberton M. Defining the components of a self-  
36 management programme for men with uncomplicated lower urinary tract symptoms: a consensus  
37 approach. *Eur Urol*. 2004;46(2):254–62; discussion 263.  
38
- 39  
40 19. Shah D, Badlani G. Treatment of overactive bladder and incontinence in the elderly. *Rev Urol*. 2002;4  
41 Suppl 4:S38-43.  
42
- 43  
44 20. Abrams P, Cardozo L, Fall M, Griffiths D, Rosier P, Ulmsten U, et al. The standardisation of  
45 terminology of lower urinary tract function: report from the Standardisation Sub-committee of the  
46 International Continence Society. *Neurourol Urodyn*. 2002;21(2):167–78.  
47
- 48  
49 21. EUPATI Open Classroom. RISK FACTORS IN HEALTH AND DISEASE [Internet]. [cited 2022 Aug  
50 17]. Available from: <https://learning.eupati.eu/mod/book/view.php?id=215>  
51  
52  
53  
54  
55  
56  
57  
58  
59  
60

- 1  
2  
3 22. Cancer Care Ontario, Prevention and Cancer Control (Population Health and Prevention). Modifiable  
4 Risk Factors [Internet]. Available from: [https://www.cancercareontario.ca/en/data-research/view-](https://www.cancercareontario.ca/en/data-research/view-data/modifiable-risk-factors)  
5  
6 [data/modifiable-risk-factors](https://www.cancercareontario.ca/en/data-research/view-data/modifiable-risk-factors)  
7  
8
- 9 23. Peters M, Godfrey C, Mclnerney P, Munn Z, Trico A, Khalil H. Chapter 11: Scoping Reviews. In:  
10 Aromataris E, Munn Z, editors. JBI Manual for Evidence Synthesis [Internet]. JBI; 2020 [cited  
11 2022 Sep 27]. Available from:  
12  
13 <https://wiki.jbi.global/display/MANUAL/Chapter+11%3A+Scoping+reviews>  
14  
15
- 16 24. Tricco AC, Lillie E, Zarin W, O'Brien KK, Colquhoun H, Levac D, et al. PRISMA Extension for  
17 Scoping Reviews (PRISMA-ScR): Checklist and Explanation. *Ann Intern Med.* 2018;169(7):467–  
18  
19 73.  
20  
21
- 22 25. McGowan J, Sampson M, Salzwedel DM, Cogo E, Foerster V, Lefebvre C. PRESS Peer Review of  
23 Electronic Search Strategies: 2015 Guideline Statement. *J Clin Epidemiol.* 2016;75:40–6.  
24  
25
- 26 26. Haddaway NR, Collins AM, Coughlin D, Kirk S. The Role of Google Scholar in Evidence Reviews and  
27 Its Applicability to Grey Literature Searching. Wray KB, editor. *PLOS ONE.* 2015;10(9):e0138237.  
28  
29
- 30 27. Work on Grey in Progress. 6th International Conference on Grey Literature [Internet]. TextRelease;  
31 Amsterdam; 2004. Available from:  
32  
33 ([http://greyguide.isti.cnr.it/attachments/category/30/GL6\\_Conference\\_Proceedings.pdf](http://greyguide.isti.cnr.it/attachments/category/30/GL6_Conference_Proceedings.pdf))  
34  
35
- 36 28. Covidence systematic review software [Internet]. Melbourne, Australia: Veritas Health Innovation;  
37 Available from: [www.covidence.org](http://www.covidence.org)  
38
- 39 29. McHugh ML. Interrater reliability: the kappa statistic. *Biochem Medica.* 2012;22(3):276–82.  
40
- 41 30. JBI Data Extraction Form for Review for Systematic Reviews and Research Syntheses [Internet].  
42 BMJ Open; [cited 2022 Jun 15]. Available from:  
43  
44 [https://bmjopen.bmj.com/content/bmjopen/9/7/e029811/DC3/embed/inline-supplementary-](https://bmjopen.bmj.com/content/bmjopen/9/7/e029811/DC3/embed/inline-supplementary-material-3.pdf?download=true)  
45  
46 [material-3.pdf?download=true](https://bmjopen.bmj.com/content/bmjopen/9/7/e029811/DC3/embed/inline-supplementary-material-3.pdf?download=true)  
47  
48  
49  
50  
51  
52  
53  
54  
55  
56  
57  
58  
59  
60

## APPENDIXES

### Appendix I: Search strategy

Ovid MEDLINE(R) ALL <1946 to May 24, 2022>

|    |                                                                                                                                                                                     |           |
|----|-------------------------------------------------------------------------------------------------------------------------------------------------------------------------------------|-----------|
| 1  | exp Male/ and exp Aged/                                                                                                                                                             | 2,684,034 |
| 2  | exp Aging/ and exp Male/                                                                                                                                                            | 135,117   |
| 3  | exp Male/ and exp "Aged, 80 and over"/                                                                                                                                              | 850,025   |
| 4  | exp Geriatrics/ and exp Male/                                                                                                                                                       | 4,724     |
| 5  | ((older or ag?ing or aged or senior* or elder* or gerontolog* or geriatric* or "old age") adj3 (male* or man or men)).mp.                                                           | 105,120   |
| 6  | (men over adj ("60" or "65" or "70" or "75" or "80" or "85" or "90")).mp.                                                                                                           | 414       |
| 7  | (male* over adj ("60" or "65" or "70" or "75" or "80" or "85" or "90")).mp.                                                                                                         | 148       |
| 8  | or/1-7                                                                                                                                                                              | 2,807,887 |
| 9  | exp Urinary Incontinence/                                                                                                                                                           | 35,150    |
| 10 | ((urin* or bladder) adj2 (incontinen* or continen*)).mp.                                                                                                                            | 48,546    |
| 11 | exp Urinary Bladder, Overactive/                                                                                                                                                    | 5,510     |
| 12 | ((overactiv* or hyper* or detrusor or vesic*) adj2 bladder).mp.                                                                                                                     | 11,440    |
| 13 | (bladder* adj2 (neuropath* or neurogen* or neurolog*)).mp.                                                                                                                          | 10,343    |
| 14 | ((bladder or detrusor or vesic*) adj5 (instability or stab* or unstable or irritab* or hyperreflexia or dys?ynerg* or dyskinesi* or irritat*)).mp.                                  | 6,390     |
| 15 | (nervous adj1 (pollakisur* or pollakiur*)).mp.                                                                                                                                      | 5         |
| 16 | or/9-15                                                                                                                                                                             | 67,490    |
| 17 | exp Risk Factors/                                                                                                                                                                   | 926,730   |
| 18 | risk*.ti. or risk factor*.ab. /freq=3                                                                                                                                               | 613,850   |
| 19 | (predict* or cause*).ti. or ((modifiable or behavio?r* or contribut* or transient* or adjust* or temporar* or chang* or adapt* or alter*) adj3 (factor* or predict* or cause*)).mp. | 1,005,389 |
| 20 | relative risk*.mp.                                                                                                                                                                  | 86,221    |
| 21 | or/17-20                                                                                                                                                                            | 2,172,971 |
| 22 | 8 and 16 and 21                                                                                                                                                                     | 1,662     |
| 23 | limit 22 to english language                                                                                                                                                        | 1,493     |

**Appendix II: Data extraction form**

|                                                    |  |
|----------------------------------------------------|--|
| Study Details                                      |  |
| Author/year                                        |  |
| objectives                                         |  |
| Participants (characteristics/total number)        |  |
| Setting/context                                    |  |
| Description of Interventions/phenomena of interest |  |
| Search Details                                     |  |
| Sources searched                                   |  |
| Range (yrs) of included studies                    |  |
| Number of studies included                         |  |
| Types of studies included                          |  |
| Country of origin of incl. studies                 |  |
| Analysis                                           |  |
| Method of analysis                                 |  |
| Outcome assessed                                   |  |
| Results/Findings                                   |  |
| Significance/direction                             |  |
| Heterogeneity                                      |  |
| Comments                                           |  |



# BMJ Open

## URINARY INCONTINENCE IN OLDER MEN: PROTOCOL FOR A SCOPING REVIEW OF RISK FACTORS

|                                 |                                                                                                                                                                                                                                                                                                                                            |
|---------------------------------|--------------------------------------------------------------------------------------------------------------------------------------------------------------------------------------------------------------------------------------------------------------------------------------------------------------------------------------------|
| Journal:                        | <i>BMJ Open</i>                                                                                                                                                                                                                                                                                                                            |
| Manuscript ID                   | bmjopen-2022-068956.R1                                                                                                                                                                                                                                                                                                                     |
| Article Type:                   | Protocol                                                                                                                                                                                                                                                                                                                                   |
| Date Submitted by the Author:   | 23-Nov-2022                                                                                                                                                                                                                                                                                                                                |
| Complete List of Authors:       | Olagundoye, Olawunmi; University of Alberta Faculty of Medicine & Dentistry, Medicine<br>Kung, Janice ; University of Alberta, John W. Scott Health Sciences Library<br>Gibson, W.; University of Alberta Faculty of Medicine and Dentistry, Division of Geriatric Medicine<br>Wagg, Adrian; University of Alberta, Department of Medicine |
| <b>Primary Subject Heading</b>: | Geriatric medicine                                                                                                                                                                                                                                                                                                                         |
| Secondary Subject Heading:      | Epidemiology, Urology                                                                                                                                                                                                                                                                                                                      |
| Keywords:                       | GERIATRIC MEDICINE, Urinary incontinences < UROLOGY, EPIDEMIOLOGY                                                                                                                                                                                                                                                                          |
|                                 |                                                                                                                                                                                                                                                                                                                                            |

SCHOLARONE™  
Manuscripts

**TITLE PAGE**

**Protocol title:** Urinary incontinence in older men: protocol for a scoping review of risk factors

**Authors:**

Olawunmi Olagundoye

Janice Y. Kung

William Gibson

Adrian Wagg

**Corresponding author:** Olawunmi Olagundoye

Postal address: College of Health Sciences, Faculty of Medicine & Dentistry

Department of Medicine, Division of Geriatric Medicine

1-198 Clinical Sciences Building 11350 – 83 Ave

Edmonton, AB, Canada T6G 2G3

Telephone number: +1 780.492.5338

Fax number: 780.492.2874

Email address: [olagundo@ualberta.ca](mailto:olagundo@ualberta.ca)

**Co-authors' affiliations:**

Janice Y. Kung, University of Alberta, Edmonton, Canada

William Gibson, University of Alberta, Edmonton, Canada

Adrian Wagg, University of Alberta, Edmonton, Canada

**Keywords:**

urinary incontinence; older men; overactive bladder; risk factors; geriatrics

**Word count:** 2105

# URINARY INCONTINENCE IN OLDER MEN: PROTOCOL FOR A SCOPING REVIEW OF RISK FACTORS

## ABSTRACT

**Introduction:** Urinary Incontinence (UI) is common among older men. Epidemiological studies have established many risk factors for UI but these studies are not always specific to men aged 65 and above. The literature is yet to be systematically and comprehensively reviewed to identify UI risk factors specific to these men. Such evidence is required for the development of evidence-based interventions. This scoping review will synthesize evidence regarding UI risk factors in older men.

**Methods and analysis:** The Joanna Briggs Institute (JBI) method for scoping reviews will guide the conduct of this scoping review and its reporting alongside the Preferred Reporting Items for Systematic Reviews and Meta-analyses extension for scoping reviews (PRISMA-ScR) checklist. JBI's Population, Concept, and Context (PCC) framework is used to frame inclusion criteria, and JBI's scoping review protocol template is used to format this protocol. Our comprehensive search will include Ovid MEDLINE, Ovid Embase, CINAHL, Scopus, Web of Science Core Collection, Cochrane Library (via Wiley), and ProQuest Dissertations & Theses Global. There will be no language restriction since approximately 10% of preliminary search results were in languages other than English (LOTE). Study type or publication date will not be restricted. Besides databases, we will review Google Scholar results and bibliographies. Two independent reviewers will screen, select, and extract eligible studies. A preliminary search was performed on 24<sup>th</sup> May, 2022. The search strategy and data extraction template are in the appendix. A qualitative and quantitative analysis of data will be performed as a means of describing the risk factors for UI identified among older men by using frequencies and descriptive methods.

**Ethics and dissemination:** The review does not require ethics approval. Findings will be disseminated at conferences, in a peer-reviewed journal and used to inform the development of an evidence-based tool for self-management of UI in older men.

**Registration:** The protocol is registered in the Open Science Framework [<https://osf.io/xsrge/>].

### Strengths and limitations of the proposed study

- In this review, evidence on UI risk factors will be mapped and synthesized in a systematic and comprehensive way, focusing specifically on older men.
- Cost-effective prevention and treatment programs aimed at older men will be informed by an understanding of UI risk factors.
- It will identify knowledge gaps associated with UI risk factors among older men, thereby highlighting future research directions.
- In order to map out the evidence base, the review will not include a quality appraisal of individual sources of evidence, regardless of their level on the hierarchy of evidence. This is in accordance with the JBI's scoping review method.

## INTRODUCTION

The International Continence Society defines urinary incontinence (UI) as the complaint of any involuntary leakage of urine.[1] UI comes with huge costs to individuals, employers, and the health care system in Canada, estimated at \$8.5 billion annually in 2014,[2] and \$65.9 billion in the United States in 2007.[3] For the majority of sufferers, UI is a chronic stigmatizing condition that is under-reported and under-treated.[2] UI is under-prioritized and under-researched, particularly in older men (defined here as men 65+), and there have been calls for more targeted research focusing on this specific group.[4,5]

The prevalence of male UI is higher among older than younger men, reaching 30% compared to 10% and 16% in younger and middle-aged men from a Canadian Bladder survey.[6] In the United States, UI prevalence increases with age from 11% among men 60 to 64 years old to 31% among men 85 years and above.[7] International epidemiological data suggest that the prevalence of UI is 4.81% to 32.17% among community-dwelling men and 21% to 32% among older men.[8] The Sixth International Consultation on Incontinence notes that the epidemiology of male UI has received less attention compared to female UI, and that UI prevalence seems to rise more steadily with advancing age in males than in females.[5] The prevalence of Urgency Urinary Incontinence is similar in both men and women and increases in association with increasing age.[9]

Although the overall prevalence of UI in older men is about half that of older women,[5] the consequences of UI in older men are equally far-reaching, affecting their quality of life, levels of physical activity, and economic productivity, posing significant physical, psychological, social, sexual, and financial burdens.[10] Similar to the experiences of older women, UI in older men increases the risks of institutionalization,[8] self-isolation, and depression.[2]

Much of the limited research on male UI has focused on its prevalence [6,8,11] and associated risk factors in general [8,11,12].

Most UI epidemiological studies have not systematically identified risk factors for UI in older men and have not sought to categorize them. Although age groups were not specified, the Sixth International Consultation on Incontinence documents some established risk factors predisposing men in general to UI including "increasing age, presence of LUTS, urinary tract infections, functional and cognitive impairment, diabetes, alcohol intake, neurological disorders, and prostatectomy." [5]

Given the financial burden of UI, an understanding of risk factors can inform cost-effective prevention and treatment programs such as self-management; a promising and proven intervention for managing chronic conditions like UI.[13] Evidence about factors amenable to modification will allow the development of evidence-based interventions for self-management of UI in older men, a strategy found to be effective in older women.[14,15]

1  
2  
3 So far, self-management intervention packages for men have targeted uncomplicated lower urinary tract  
4 symptoms (LUTS) generally and mostly in men with prostate disease (Benign Prostatic Hyperplasia  
5 [BPH]/Benign Prostatic Enlargement [BPE]). These packages vary in their components, recommendations,  
6 and outcomes.[16–18] The inconsistencies and heterogeneity of these recommendations, the lack of clarity  
7 as to what should constitute the optimal package of components for self-management, and the need to  
8 focus specifically on the population of older men with UI [4] necessitate a comprehensive mapping of the  
9 full breadth of evidence through a scoping review of risk factors for UI in older men.  
10  
11  
12  
13

14 As part of a larger study, this scoping review aims to synthesize evidence on risk factors as the starting  
15 point in the creation of a self-management intervention targeting older men. The findings from this scoping  
16 review will inform a formal process to define and prioritize risk factors amenable to self-management that  
17 older male patients find practicable and are potentially willing to modify.  
18  
19  
20

21 The objective of this scoping review therefore is to identify risk factors for UI in older men.  
22  
23

24 We found no current or ongoing review on our topic after a preliminary search of MEDLINE, PubMed, the  
25 Cochrane Database of Systematic Reviews, and *JBI Evidence Synthesis*. In addition, inquiries to subject  
26 matter experts at the 2022 International Continence Society's scientific conference revealed that our topic  
27 was not currently under review.  
28  
29  
30

### 31 **Review question**

32  
33 What are the risk factors for urinary incontinence in older men?  
34  
35

### 36 **Eligibility criteria**

#### 37 *Participants*

38  
39  
40  
41 **Inclusion criteria:** All sources of evidence on UI risk factors that include older men (65+).  
42  
43

44 **Exclusion criteria:** Data derived solely from men under 65 years of age or exclusively from women will  
45 be excluded. We will exclude articles featuring combined datasets where it is impossible to extract the UI  
46 risk factors for older men due to a lack of age stratification. Similarly, where studies retrieved include  
47 information on both men and women, only data stratified by sex will be reported.  
48  
49  
50

#### 51 *Concepts*

52  
53 Urinary incontinence is a storage symptom of the lower urinary tract defined as the complaint of any  
54 involuntary loss/leakage of urine.[1] UI can be classified as reversible or established. Reversible UI has a  
55  
56  
57

1  
2  
3 treatable cause and is more common among hospitalized older patients, and residents in long-term care  
4 [19] while established UI is chronic, and it may not be possible to identify a reversible cause. The five major  
5 types of established UI are urgency, stress (exertional), overflow, functional (disability associated), and  
6 mixed urinary incontinence.[20]  
7  
8

9  
10 Risk factors are characteristics, conditions, behaviours or exposures that increase the likelihood of getting  
11 a disease or injury.[21] There are general risk factors that may apply to chronic diseases in general (tobacco  
12 use, alcohol consumption, physical inactivity, excess weight, and poor nutrition)[22] as well as specific risk  
13 factors for UI. They also include those characteristics or conditions that increase the possibility of getting a  
14 disease or injury.[21] Generally, risk factors can be grouped into categories: *Behavioural risk factors* relate  
15 to the actions that individuals have chosen to take, and can be eliminated or modified through lifestyle or  
16 behavioural changes. Examples include tobacco smoking, excessive alcohol use, poor nutrition, and  
17 physical inactivity.[21] *Physiological risk factors* are those relating to an individual's body. They may be  
18 influenced by an interaction of genetics, lifestyle, and other broad factors. Examples include overweight or  
19 obesity, high blood pressure, high blood cholesterol, and high blood sugar. *Demographic risk factors* relate  
20 to the overall population. Examples are age, occupation, religion, or income. *Environmental risk factors*  
21 cover a wide range of topics such as social, economic, cultural, political, physical, chemical, and biological  
22 factors. Examples include air pollution, workplace risks, access to clean water and sanitation, and social  
23 interactions. *Genetic risk factors* are based on an individual's genetic make-up. While some diseases are  
24 mainly genetic, others reflect an interaction between genetic and environmental factors.[21]  
25  
26  
27  
28  
29  
30  
31

### 32 *Context*

33  
34  
35 All settings for older men with UI.  
36  
37

### 38 *Types of sources*

39  
40 All study designs will be included in this scoping review without restriction. It will consider published and  
41 unpublished sources. Text, opinion papers, and other grey literature will also be considered for  
42 inclusion.[23]  
43  
44  
45

## 46 **METHODS AND ANALYSIS**

47  
48 We will conduct our scoping review following the Joanna Briggs Institute (JBI) method for scoping  
49 review,[23] and in line with the Preferred Reporting Items for Systematic Reviews and Meta-analyses  
50 extension for scoping reviews (PRISMA-ScR) checklist.[24]  
51  
52  
53  
54  
55  
56  
57

## Search strategy

The search strategy will aim to locate both published and unpublished studies. A medical librarian (JYK) performed an initial search of MEDLINE on 24<sup>th</sup> May, 2022, to identify articles on the topic. The text words contained in the titles and abstracts of relevant articles, and the index terms used to describe the articles were used to develop a full search strategy for Ovid MEDLINE (Appendix I). The search strategy, including all identified keywords and index terms, will be adapted for each included database or information source. It will be reviewed by other members of the research team and if necessary, by a second librarian using the Peer Review of Electronic Search Strategies (PRESS) guideline.[25] The search strategy will be updated six months after it was originally run, and prior to submission for publication, the search will be updated to reflect newly published studies since the original run.

Studies published in any language will be included. We will compare translations from two validated online language translators; DeepL translator and Google translator (<https://www.deepl.com/en/translator> and <https://translate.google.com/>) for LOTE and double-check with colleagues who are known native speakers of the LOTE when necessary. Relevant studies published since the inception of the databases to date will be included. In addition to subscription databases, the research team will review the first 200 results from Google Scholar for inclusion. This is a reasonable number of results to screen since there is a high overlap between Web of Science and Google Scholar.[26] The reference list of all included sources of evidence will be screened for additional studies.

The databases to be searched are Ovid MEDLINE, Ovid Embase, CINAHL, Scopus, Web of Science Core Collection, Cochrane Library (via Wiley), and ProQuest Dissertations & Theses Global. Sources of unpublished studies/ grey literature include (conference proceedings, information from government health agencies, academic institutions, and professional societies). Grey literature consists of unpublished literature, including publicly available information produced by all levels of government, academic institutions, business, and industry, in print and electronic formats, which is not controlled by commercial publishers.[27] We will use general and targeted internet searches for the electronic formats of these documents. General searches will involve the use of Google, while targeted searches will examine the websites of national and international organizations addressing the subject matter.

## Study/Source of Evidence selection

All identified citations from the search will be collated and uploaded into Covidence (Veritas Health Innovation Ltd, Melbourne); a web-based collaboration software platform that streamlines the production of systematic and other literature reviews.[28] After automatic removal of duplicates, two reviewers will independently screen titles and abstracts of a random sample of 5% of studies identified with our literature search. They will discuss the results and review the eligibility criteria as needed. We will check the inter-



1  
2  
3 reviewer agreement for inclusion or exclusion between these reviewers using the kappa statistics.[29] A  
4 Cohen kappa coefficient ( $\kappa$  value) of 0.41-0.60 indicates moderate agreement, 0.61-0.80 indicates  
5 substantial agreement, and 0.81-1.00 is almost perfect agreement.[29]  $\kappa$  value  $>0.61$  will be considered  
6 sufficient to proceed.  
7  
8  
9

10 Potential reasons for exclusion will be defined a priori, categorized, recorded, and reported in the scoping  
11 review. The full text of included citations will then be assessed in detail against the inclusion criteria by two  
12 independent reviewers. Any disagreements that arise during the selection process will be resolved through  
13 discussion and consensus between reviewers, and if needed, with a third party.[23] The results of the  
14 search and the study inclusion process will be reported in full and presented in a Preferred Reporting Items  
15 for Systematic Reviews and Meta-analyses extension for scoping review (PRISMA-ScR) flow diagram.[24]  
16  
17  
18

### 19 **Data Extraction**

20 Data will be extracted from papers using a data extraction tool based on JBI's data extraction form template  
21 (Appendix II).[30] The data extracted will include specific details about the country, authors, participants,  
22 concept, context, study methods, and key findings relevant to the review question.  
23  
24  
25  
26

27 Two reviewers will pilot test the draft extraction form through a calibration exercise to guide the selection of  
28 evidence sources to ensure the form captures all relevant data. They will then extract data independently  
29 from included studies into the draft. The draft data extraction tool will be modified and revised as necessary.  
30 Any modifications will be detailed in the scoping review. Any disagreements that arise between the  
31 reviewers will be resolved through discussion, or with an additional reviewer. If appropriate, authors of  
32 papers will be contacted to request missing or additional data where required.  
33  
34  
35  
36

### 37 **Risk of bias**

38 In accordance with JBI method for scoping reviews, no quality appraisal will be conducted.[23] Rather than  
39 engaging in formal quality assessments, we will assign a level of evidence rating to each study based on  
40 JBI's well-established categorization of studies.  
41  
42  
43  
44

### 45 **Data Analysis and Presentation**

46 We will summarize data quantitatively (using frequencies) and qualitatively (using the descriptive-analytical  
47 method). If possible, we will stratify results by the economic status of the country (e.g., low-, middle-, or  
48 high-income country), ethnicity/race, and health context (e.g., primary, secondary, and tertiary care). Data  
49 will be presented in diagrammatic or tabular form. A narrative summary will accompany the tables and  
50 charts and will describe how the results relate to the review objective and question.  
51  
52  
53  
54  
55  
56  
57

### **Patient and public involvement**

It might not be appropriate or possible to involve patients or the public in the design, conduct, reporting and dissemination plans of our review. However, a patient advisory group will be involved in translating evidence from the review into co-creating a patient-centered tool for self-management of UI in the context of a larger study.

### **Ethics and dissemination**

The review does not require ethics approval. Findings will be disseminated through presentations at conferences/workshops, peer-reviewed publication, health blogs, and other social media platforms such as LinkedIn, Twitter, and Instagram.

### **Copyright/license for publication**

"The Corresponding Author has the right to grant on behalf of all authors and does grant on behalf of all authors, a worldwide licence to the Publishers and its licensees in perpetuity, in all forms, formats and media (whether known now or created in the future), to i) publish, reproduce, distribute, display and store the Contribution, ii) translate the Contribution into other languages, create adaptations, reprints, include within collections and create summaries, extracts and/or, abstracts of the Contribution, iii) create any other derivative work(s) based on the Contribution, iv) to exploit all subsidiary rights in the Contribution, v) the inclusion of electronic links from the Contribution to third party material where-ever it may be located; and, vi) licence any third party to do any or all of the above."

**Acknowledgement:** This review contributes towards a PhD degree award for OO.

**Authors' contributions:** OO and AW contributed to the conceptualization, design, literature search, manuscript writing and manuscript editing. JK developed the search strategy, conducted the searches, and contributed to manuscript writing. WG contributed to the literature search, manuscript review and editing. All authors approved the final manuscript.

**Funding statement:** The review has received no specific grant from any funding agency in the public, commercial or not-for-profit sectors.

**Competing interest statement:** The authors have no competing interests to declare.

**Patient consent for publication:** Not required.

**REFERENCES**

1. D'Ancona C, Haylen B, Oelke M, Abranches-Monteiro L, Arnold E, Goldman H, et al. The International Continence Society (ICS) report on the terminology for adult male lower urinary tract and pelvic floor symptoms and dysfunction. *Neurourol Urodyn*. 2019;38(2):433–77.
2. The Canadian Continence Foundation. The Impact of Incontinence in Canada. A briefing document for policy makers [Internet]. 2014. Available from: <https://www.canadiancontinence.ca/pdfs/en-impact-of-incontinence-in-canada-2014.pdf>
3. Coyne KS, Wein A, Nicholson S, Kvasz M, Chen CI, Milsom I. Economic burden of urgency urinary incontinence in the United States: a systematic review. *J Manag Care Pharm JMCP*. 2014;20(2):130–40.
4. Wagg A. Male Overactive Bladder: Underappreciated, Under-researched. More Please? *Eur Urol*. 2021;79(4):505–6.
5. Abrams P, Cardozo L, Wagg A, Wein A. (Eds). *Incontinence*. Vol. 1. Bristol UK: ICI-ICS. International Continence Society; 2017. 35–36 p.
6. Herschorn S, Gajewski J, Schulz J, Corcos J. A population-based study of urinary symptoms and incontinence: the Canadian Urinary Bladder Survey. *BJU Int*. 2007;22(5):52–8.
7. Anger JT, Saigal CS, Stothers L, Thom DH, Rodríguez LV, Litwin MS, et al. The prevalence of urinary incontinence among community dwelling men: results from the National Health and Nutrition Examination survey. *J Urol*. 2006;176(5):2103–8; discussion 2108.
8. Shamliyan TA, Wyman JF, Ping R, Wilt TJ, Kane RL. Male urinary incontinence: prevalence, risk factors, and preventive interventions. *Rev Urol*. 2009;11(3):145–65.
9. Irwin DE, Milsom I, Hunskaar S, Reilly K, Kopp Z, Herschorn S, et al. Population-based survey of urinary incontinence, overactive bladder, and other lower urinary tract symptoms in five countries: results of the EPIC study. *Eur Urol*. 2006;50(6):1306–14; discussion 1314-1315.
10. Chung E, Katz DJ, Love C. Adult male stress and urge urinary incontinence - A review of pathophysiology and treatment strategies for voiding dysfunction in men. *Aust Fam Physician*. 2017;46(9):661–6.

- 1  
2  
3 11. Abrams P, Cardozo L, Khoury S, Wein A, editors. INCONTINENCE [Internet]. 5th ed. 2013. Available  
4 from: [https://www.ics.org/Publications/ICI\\_5/INCONTINENCE.pdf](https://www.ics.org/Publications/ICI_5/INCONTINENCE.pdf)  
5
- 6  
7 12. Fernández-Cuadros ME, Nieto-Blasco J, Geanini-Yagüez A, Ciprián-Nieto D, Padilla-Fernández B,  
8 Lorenzo-Gómez MF. Male Urinary Incontinence: Associated Risk Factors and Electromyography  
9 Biofeedback Results in Quality of Life. *Am J Mens Health*. 2016;10(6):NP127–35.  
10
- 11  
12 13. Grady PA, Gough LL. Self-management: a comprehensive approach to management of chronic  
13 conditions. *Am J Public Health*. 2014;104(8):e25-31.  
14
- 15  
16 14. Tannenbaum C, van den Heuvel E, Fritel X, Southall K, Jutai J, Rajabali S, et al. Continence Across  
17 Continents To Upend Stigma and Dependency (CACTUS-D): study protocol for a cluster  
18 randomized controlled trial. *Trials*. 2015;16(1):565.  
19
- 20  
21 15. Holroyd-Leduc JM, Straus S, Thorpe K, Davis DA, Schmaltz H, Tannenbaum C. Translation of  
22 evidence into a self-management tool for use by women with urinary incontinence†. *Age Ageing*.  
23 2011;40(2):227–33.  
24
- 25  
26 16. Albarqouni L, Sanders S, Clark J, Tikkinen KAO, Glasziou P. Self-Management for Men With Lower  
27 Urinary Tract Symptoms: A Systematic Review and Meta-Analysis. *Ann Fam Med*.  
28 2021;19(2):157–67.  
29
- 30  
31 17. Brown CT, Yap T, Cromwell DA, Rixon L, Steed L, Mulligan K, et al. Self management for men with  
32 lower urinary tract symptoms: randomised controlled trial. *BMJ*. 2007 6;334(7583):25.  
33
- 34  
35 18. Brown CT, van der Meulen J, Mundy AR, O'Flynn E, Emberton M. Defining the components of a self-  
36 management programme for men with uncomplicated lower urinary tract symptoms: a consensus  
37 approach. *Eur Urol*. 2004;46(2):254–62; discussion 263.  
38
- 39  
40 19. Shah D, Badlani G. Treatment of overactive bladder and incontinence in the elderly. *Rev Urol*. 2002;4  
41 Suppl 4:S38-43.  
42
- 43  
44 20. Abrams P, Cardozo L, Fall M, Griffiths D, Rosier P, Ulmsten U, et al. The standardisation of  
45 terminology of lower urinary tract function: report from the Standardisation Sub-committee of the  
46 International Continence Society. *Neurourol Urodyn*. 2002;21(2):167–78.  
47
- 48  
49 21. EUPATI Open Classroom. RISK FACTORS IN HEALTH AND DISEASE [Internet]. [cited 2022 Aug  
50 17]. Available from: <https://learning.eupati.eu/mod/book/view.php?id=215>  
51  
52  
53  
54  
55  
56  
57

- 1  
2  
3 22. Cancer Care Ontario, Prevention and Cancer Control (Population Health and Prevention). Modifiable  
4 Risk Factors [Internet]. Available from: [https://www.cancercareontario.ca/en/data-research/view-](https://www.cancercareontario.ca/en/data-research/view-data/modifiable-risk-factors)  
5  
6 [data/modifiable-risk-factors](https://www.cancercareontario.ca/en/data-research/view-data/modifiable-risk-factors)  
7  
8
- 9 23. Peters M, Godfrey C, Mclnerney P, Munn Z, Trico A, Khalil H. Chapter 11: Scoping Reviews. In:  
10 Aromataris E, Munn Z, editors. JBI Manual for Evidence Synthesis [Internet]. JBI; 2020 [cited  
11 2022 Sep 27]. Available from:  
12  
13 <https://wiki.jbi.global/display/MANUAL/Chapter+11%3A+Scoping+reviews>  
14  
15
- 16 24. Tricco AC, Lillie E, Zarin W, O'Brien KK, Colquhoun H, Levac D, et al. PRISMA Extension for  
17 Scoping Reviews (PRISMA-ScR): Checklist and Explanation. *Ann Intern Med.* 2018;169(7):467–  
18  
19 73.  
20  
21
- 22 25. McGowan J, Sampson M, Salzwedel DM, Cogo E, Foerster V, Lefebvre C. PRESS Peer Review of  
23 Electronic Search Strategies: 2015 Guideline Statement. *J Clin Epidemiol.* 2016;75:40–6.  
24  
25
- 26 26. Haddaway NR, Collins AM, Coughlin D, Kirk S. The Role of Google Scholar in Evidence Reviews and  
27 Its Applicability to Grey Literature Searching. Wray KB, editor. *PLOS ONE.* 2015;10(9):e0138237.  
28  
29
- 30 27. Work on Grey in Progress. 6th International Conference on Grey Literature [Internet]. TextRelease;  
31 Amsterdam; 2004. Available from:  
32  
33 ([http://greyguide.isti.cnr.it/attachments/category/30/GL6\\_Conference\\_Proceedings.pdf](http://greyguide.isti.cnr.it/attachments/category/30/GL6_Conference_Proceedings.pdf))  
34  
35
- 36 28. Covidence systematic review software [Internet]. Melbourne, Australia: Veritas Health Innovation;  
37 Available from: [www.covidence.org](http://www.covidence.org)  
38
- 39 29. McHugh ML. Interrater reliability: the kappa statistic. *Biochem Medica.* 2012;22(3):276–82.  
40
- 41 30. JBI Data Extraction Form for Review for Systematic Reviews and Research Syntheses [Internet].  
42 BMJ Open; [cited 2022 Jun 15]. Available from:  
43  
44 [https://bmjopen.bmj.com/content/bmjopen/9/7/e029811/DC3/embed/inline-supplementary-](https://bmjopen.bmj.com/content/bmjopen/9/7/e029811/DC3/embed/inline-supplementary-material-3.pdf?download=true)  
45  
46 [material-3.pdf?download=true](https://bmjopen.bmj.com/content/bmjopen/9/7/e029811/DC3/embed/inline-supplementary-material-3.pdf?download=true)  
47  
48  
49  
50  
51  
52  
53  
54  
55  
56  
57  
58  
59  
60

## APPENDIXES

### Appendix I: Search strategy

Ovid MEDLINE(R) ALL <1946 to May 24, 2022>

|    |                                                                                                                                                                                     |           |
|----|-------------------------------------------------------------------------------------------------------------------------------------------------------------------------------------|-----------|
| 1  | exp Male/ and exp Aged/                                                                                                                                                             | 2,684,034 |
| 2  | exp Aging/ and exp Male/                                                                                                                                                            | 135,117   |
| 3  | exp Male/ and exp "Aged, 80 and over"/                                                                                                                                              | 850,025   |
| 4  | exp Geriatrics/ and exp Male/                                                                                                                                                       | 4,724     |
| 5  | ((older or ag?ing or aged or senior* or elder* or gerontolog* or geriatric* or "old age") adj3 (male* or man or men)).mp.                                                           | 105,120   |
| 6  | (men over adj ("60" or "65" or "70" or "75" or "80" or "85" or "90")).mp.                                                                                                           | 414       |
| 7  | (male* over adj ("60" or "65" or "70" or "75" or "80" or "85" or "90")).mp.                                                                                                         | 148       |
| 8  | or/1-7                                                                                                                                                                              | 2,807,887 |
| 9  | exp Urinary Incontinence/                                                                                                                                                           | 35,150    |
| 10 | ((urin* or bladder) adj2 (incontinen* or continen*)).mp.                                                                                                                            | 48,546    |
| 11 | exp Urinary Bladder, Overactive/                                                                                                                                                    | 5,510     |
| 12 | ((overactiv* or hyper* or detrusor or vesic*) adj2 bladder).mp.                                                                                                                     | 11,440    |
| 13 | (bladder* adj2 (neuropath* or neurogen* or neurolog*)).mp.                                                                                                                          | 10,343    |
| 14 | ((bladder or detrusor or vesic*) adj5 (instability or stab* or unstable or irritab* or hyperreflexia or dys?ynerg* or dyskinesi* or irritat*)).mp.                                  | 6,390     |
| 15 | (nervous adj1 (pollakisur* or pollakiur*)).mp.                                                                                                                                      | 5         |
| 16 | or/9-15                                                                                                                                                                             | 67,490    |
| 17 | exp Risk Factors/                                                                                                                                                                   | 926,730   |
| 18 | risk*.ti. or risk factor*.ab. /freq=3                                                                                                                                               | 613,850   |
| 19 | (predict* or cause*).ti. or ((modifiable or behavio?r* or contribut* or transient* or adjust* or temporar* or chang* or adapt* or alter*) adj3 (factor* or predict* or cause*)).mp. | 1,005,389 |
| 20 | relative risk*.mp.                                                                                                                                                                  | 86,221    |
| 21 | or/17-20                                                                                                                                                                            | 2,172,971 |
| 22 | 8 and 16 and 21                                                                                                                                                                     | 1,662     |

**Appendix II: Data extraction form**

|                                                    |  |
|----------------------------------------------------|--|
| Study Details                                      |  |
| Author/year                                        |  |
| objectives                                         |  |
| Participants (characteristics/total number)        |  |
| Setting/context                                    |  |
| Description of Interventions/phenomena of interest |  |
| Search Details                                     |  |
| Sources searched                                   |  |
| Range (yrs) of included studies                    |  |
| Number of studies included                         |  |
| Types of studies included                          |  |
| Country of origin of incl. studies                 |  |
| Analysis                                           |  |
| Method of analysis                                 |  |
| Outcome assessed                                   |  |
| Results/Findings                                   |  |
| Significance/direction                             |  |
| Heterogeneity                                      |  |
| Comments                                           |  |

# BMJ Open

## URINARY INCONTINENCE IN OLDER MEN: PROTOCOL FOR A SCOPING REVIEW OF RISK FACTORS

|                                 |                                                                                                                                                                                                                                                                                                                                            |
|---------------------------------|--------------------------------------------------------------------------------------------------------------------------------------------------------------------------------------------------------------------------------------------------------------------------------------------------------------------------------------------|
| Journal:                        | <i>BMJ Open</i>                                                                                                                                                                                                                                                                                                                            |
| Manuscript ID                   | bmjopen-2022-068956.R2                                                                                                                                                                                                                                                                                                                     |
| Article Type:                   | Protocol                                                                                                                                                                                                                                                                                                                                   |
| Date Submitted by the Author:   | 24-Dec-2022                                                                                                                                                                                                                                                                                                                                |
| Complete List of Authors:       | Olagundoye, Olawunmi; University of Alberta Faculty of Medicine & Dentistry, Medicine<br>Kung, Janice ; University of Alberta, John W. Scott Health Sciences Library<br>Gibson, W.; University of Alberta Faculty of Medicine and Dentistry, Division of Geriatric Medicine<br>Wagg, Adrian; University of Alberta, Department of Medicine |
| <b>Primary Subject Heading</b>: | Geriatric medicine                                                                                                                                                                                                                                                                                                                         |
| Secondary Subject Heading:      | Epidemiology, Urology                                                                                                                                                                                                                                                                                                                      |
| Keywords:                       | GERIATRIC MEDICINE, Urinary incontinences < UROLOGY, EPIDEMIOLOGY                                                                                                                                                                                                                                                                          |
|                                 |                                                                                                                                                                                                                                                                                                                                            |

SCHOLARONE™  
Manuscripts



**TITLE PAGE**

**Protocol title:** Urinary incontinence in older men: protocol for a scoping review of risk factors

**Authors:**

Olawunmi Olagundoye

Janice Y. Kung

William Gibson

Adrian Wagg

**Corresponding author:** Olawunmi Olagundoye

Postal address: College of Health Sciences, Faculty of Medicine & Dentistry

Department of Medicine, Division of Geriatric Medicine

1-198 Clinical Sciences Building 11350 – 83 Ave

Edmonton, AB, Canada T6G 2G3

Telephone number: +1 780.492.5338

Fax number: 780.492.2874

Email address: [olagundo@ualberta.ca](mailto:olagundo@ualberta.ca)

**Co-authors' affiliations:**

Janice Y. Kung, University of Alberta, Edmonton, Canada

William Gibson, University of Alberta, Edmonton, Canada

Adrian Wagg, University of Alberta, Edmonton, Canada

**Keywords:**

urinary incontinence; older men; overactive bladder; risk factors; geriatrics

**Word count:** 2126

# URINARY INCONTINENCE IN OLDER MEN: PROTOCOL FOR A SCOPING REVIEW OF RISK FACTORS

## ABSTRACT

**Introduction:** Urinary Incontinence (UI) is common among older men. Epidemiological studies have established many risk factors for UI but these studies are not always specific to men aged 65 and above. The literature is yet to be systematically and comprehensively reviewed to identify UI risk factors specific to these men. Such evidence is required for the development of evidence-based interventions. This scoping review will synthesize evidence regarding UI risk factors in older men.

**Methods and analysis:** The Joanna Briggs Institute (JBI) method for scoping reviews will guide the conduct of this scoping review and its reporting alongside the Preferred Reporting Items for Systematic Reviews and Meta-analyses extension for scoping reviews (PRISMA-ScR) checklist. JBI's Population, Concept, and Context (PCC) framework is used to frame inclusion criteria, and JBI's scoping review protocol template is used to format this protocol. Our comprehensive search will include Ovid MEDLINE, Ovid Embase, CINAHL, Scopus, Web of Science Core Collection, Cochrane Library (via Wiley), and ProQuest Dissertations & Theses Global. There will be no language restriction since approximately 10% of preliminary search results were in languages other than English (LOTE). Study type or publication date will not be restricted. Besides databases, we will review Google Scholar results and bibliographies. Two independent reviewers will screen, select, and extract eligible studies. A preliminary search was performed on 24<sup>th</sup> May, 2022. The search strategy and data extraction template are in the appendix. A qualitative and quantitative analysis of data will be performed as a means of describing the risk factors for UI identified among older men by using frequencies and descriptive methods.

**Ethics and dissemination:** The review does not require ethics approval. Findings will be disseminated at conferences, in a peer-reviewed journal and used to inform the development of an evidence-based tool for self-management of UI in older men.

**Registration:** The protocol is registered in the Open Science Framework [<https://osf.io/xsrge/>].

### Strengths and limitations of the proposed study

- It will be one of the few papers to specifically focus on older men's risk factors for UI by synthesizing and mapping the evidence in a systematic and comprehensive manner.
- Through the scoping review method, knowledge gaps in the literature will be identified regarding UI risk factors among older men.
- To ensure an exhaustive search and to yield robust evidence from all sources, an extensive review of grey literature will supplement the conventional scientific database search.
- The lack of age stratification in most data on men in general and the paucity of data specifically on older men with UI will pose limitations.
- In accordance with the JBI's scoping review method, the review will not include a quality appraisal of individual sources of evidence, regardless of their level on the hierarchy of evidence.

## INTRODUCTION

The International Continence Society defines urinary incontinence (UI) as the complaint of any involuntary leakage of urine.[1] UI comes with huge costs to individuals, employers, and the health care system in Canada, estimated at \$8.5 billion annually in 2014,[2] and \$65.9 billion in the United States in 2007.[3] For the majority of sufferers, UI is a chronic stigmatizing condition that is under-reported and under-treated.[2] UI is under-prioritized and under-researched, particularly in older men (defined here as men 65+), and there have been calls for more targeted research focusing on this specific group.[4,5]

The prevalence of male UI is higher among older than younger men, reaching 30% compared to 10% and 16% in younger and middle-aged men from a Canadian Bladder survey.[6] In the United States, UI prevalence increases with age from 11% among men 60 to 64 years old to 31% among men 85 years and above.[7] International epidemiological data suggest that the prevalence of UI is 4.81% to 32.17% among community-dwelling men and 21% to 32% among older men.[8] The Sixth International Consultation on Incontinence notes that the epidemiology of male UI has received less attention compared to female UI, and that UI prevalence seems to rise more steadily with advancing age in males than in females.[5] The prevalence of Urgency Urinary Incontinence is similar in both men and women and increases in association with increasing age.[9]

Although the overall prevalence of UI in older men is about half that of older women,[5] the consequences of UI in older men are equally far-reaching, affecting their quality of life, levels of physical activity, and economic productivity, posing significant physical, psychological, social, sexual, and financial burdens.[10] Similar to the experiences of older women, UI in older men increases the risks of institutionalization,[8] self-isolation, and depression.[2]

Much of the limited research on male UI has focused on its prevalence [6,8,11] and associated risk factors in general [8,11,12].

Most UI epidemiological studies have not systematically identified risk factors for UI in older men and have not sought to categorize them. Although age groups were not specified, the Sixth International Consultation on Incontinence documents some established risk factors predisposing men in general to UI including "increasing age, presence of LUTS, urinary tract infections, functional and cognitive impairment, diabetes, alcohol intake, neurological disorders, and prostatectomy." [5]

Given the financial burden of UI, an understanding of risk factors can inform cost-effective prevention and treatment programs such as self-management; a promising and proven intervention for managing chronic conditions like UI.[13] Evidence about factors amenable to modification will allow the development of evidence-based interventions for self-management of UI in older men, a strategy found to be effective in older women.[14,15]

1  
2  
3 So far, self-management intervention packages for men have targeted uncomplicated lower urinary tract  
4 symptoms (LUTS) generally and mostly in men with prostate disease (Benign Prostatic Hyperplasia  
5 [BPH]/Benign Prostatic Enlargement [BPE]). These packages vary in their components, recommendations,  
6 and outcomes.[16–18] The inconsistencies and heterogeneity of these recommendations, the lack of clarity  
7 as to what should constitute the optimal package of components for self-management, and the need to  
8 focus specifically on the population of older men with UI [4] necessitate a comprehensive mapping of the  
9 full breadth of evidence through a scoping review of risk factors for UI in older men.  
10  
11  
12  
13

14 As part of a larger study, this scoping review aims to synthesize evidence on risk factors as the starting  
15 point in the creation of a self-management intervention targeting older men. The findings from this scoping  
16 review will inform a formal process to define and prioritize risk factors amenable to self-management that  
17 older male patients find practicable and are potentially willing to modify.  
18  
19  
20

21 The objective of this scoping review therefore is to identify risk factors for UI in older men.  
22  
23

24 We found no current or ongoing review on our topic after a preliminary search of MEDLINE, PubMed, the  
25 Cochrane Database of Systematic Reviews, and *JBI Evidence Synthesis*. In addition, inquiries to subject  
26 matter experts at the 2022 International Continence Society's scientific conference revealed that our topic  
27 was not currently under review.  
28  
29  
30

### 31 **Review question**

32  
33 What are the risk factors for urinary incontinence in older men?  
34  
35

### 36 **Eligibility criteria**

#### 37 *Participants*

38  
39  
40  
41 **Inclusion criteria:** All sources of evidence on UI risk factors that include older men (65+).  
42  
43

44 **Exclusion criteria:** Data derived solely from men under 65 years of age or exclusively from women will  
45 be excluded. We will exclude articles featuring combined datasets where it is impossible to extract the UI  
46 risk factors for older men due to a lack of age stratification. Similarly, where studies retrieved include  
47 information on both men and women, only data stratified by sex will be reported.  
48  
49  
50

#### 51 *Concepts*

52  
53 Urinary incontinence is a storage symptom of the lower urinary tract defined as the complaint of any  
54 involuntary loss/leakage of urine.[1] UI can be classified as reversible or established. Reversible UI has a  
55  
56  
57

1  
2  
3 treatable cause and is more common among hospitalized older patients, and residents in long-term care  
4 [19] while established UI is chronic, and it may not be possible to identify a reversible cause. The five major  
5 types of established UI are urgency, stress (exertional), overflow, functional (disability associated), and  
6 mixed urinary incontinence.[20]  
7  
8  
9

10 Risk factors are characteristics, conditions, behaviours or exposures that increase the likelihood of getting  
11 a disease or injury.[21] There are general risk factors that may apply to chronic diseases in general (tobacco  
12 use, alcohol consumption, physical inactivity, excess weight, and poor nutrition)[22] as well as specific risk  
13 factors for UI. They also include those characteristics or conditions that increase the possibility of getting a  
14 disease or injury.[21] Generally, risk factors can be grouped into categories: *Behavioural risk factors* relate  
15 to the actions that individuals have chosen to take, and can be eliminated or modified through lifestyle or  
16 behavioural changes. Examples include tobacco smoking, excessive alcohol use, poor nutrition, and  
17 physical inactivity.[21] *Physiological risk factors* are those relating to an individual's body. They may be  
18 influenced by an interaction of genetics, lifestyle, and other broad factors. Examples include overweight or  
19 obesity, high blood pressure, high blood cholesterol, and high blood sugar. *Demographic risk factors* relate  
20 to the overall population. Examples are age, occupation, religion, or income. *Environmental risk factors*  
21 cover a wide range of topics such as social, economic, cultural, political, physical, chemical, and biological  
22 factors. Examples include air pollution, workplace risks, access to clean water and sanitation, and social  
23 interactions. *Genetic risk factors* are based on an individual's genetic make-up. While some diseases are  
24 mainly genetic, others reflect an interaction between genetic and environmental factors.[21]  
25  
26  
27  
28  
29  
30  
31

### 32 *Context*

33  
34  
35 All settings for older men with UI.  
36  
37

### 38 *Types of sources*

39  
40 All study designs will be included in this scoping review without restriction. It will consider published and  
41 unpublished sources. Text, opinion papers, and other grey literature will also be considered for  
42 inclusion.[23]  
43  
44  
45

## 46 **METHODS AND ANALYSIS**

47  
48 We will conduct our scoping review following the Joanna Briggs Institute (JBI) method for scoping  
49 review,[23] and in line with the Preferred Reporting Items for Systematic Reviews and Meta-analyses  
50 extension for scoping reviews (PRISMA-ScR) checklist.[24]  
51  
52  
53  
54  
55  
56  
57  
58  
59  
60

## Search strategy

The search strategy will aim to locate both published and unpublished studies. A medical librarian (JYK) performed an initial search of MEDLINE on 24<sup>th</sup> May, 2022, to identify articles on the topic. The text words contained in the titles and abstracts of relevant articles, and the index terms used to describe the articles were used to develop a full search strategy for Ovid MEDLINE (Appendix I). The search strategy, including all identified keywords and index terms, will be adapted for each included database or information source. It will be reviewed by other members of the research team and if necessary, by a second librarian using the Peer Review of Electronic Search Strategies (PRESS) guideline.[25] The search strategy will be updated six months after it was originally run, and prior to submission for publication, the search will be updated to reflect newly published studies since the original run.

Studies published in any language will be included. We will compare translations from two validated online language translators; DeepL translator and Google translator (<https://www.deepl.com/en/translator> and <https://translate.google.com/>) for LOTE and double-check with colleagues who are known native speakers of the LOTE when necessary. Relevant studies published since the inception of the databases to date will be included. In addition to subscription databases, the research team will review the first 200 results from Google Scholar for inclusion. This is a reasonable number of results to screen since there is a high overlap between Web of Science and Google Scholar.[26] The reference list of all included sources of evidence will be screened for additional studies.

The databases to be searched are Ovid MEDLINE, Ovid Embase, CINAHL, Scopus, Web of Science Core Collection, Cochrane Library (via Wiley), and ProQuest Dissertations & Theses Global. Sources of unpublished studies/ grey literature include (conference proceedings, information from government health agencies, academic institutions, and professional societies). Grey literature consists of unpublished literature, including publicly available information produced by all levels of government, academic institutions, business, and industry, in print and electronic formats, which is not controlled by commercial publishers.[27] We will use general and targeted internet searches for the electronic formats of these documents. General searches will involve the use of Google, while targeted searches will examine the websites of national and international organizations addressing the subject matter.

## Study/Source of Evidence selection

All identified citations from the search will be collated and uploaded into Covidence (Veritas Health Innovation Ltd, Melbourne); a web-based collaboration software platform that streamlines the production of systematic and other literature reviews.[28] After automatic removal of duplicates, two reviewers will independently screen titles and abstracts of a random sample of 5% of studies identified with our literature search. They will discuss the results and review the eligibility criteria as needed. We will check the inter-

1  
2  
3 reviewer agreement for inclusion or exclusion between these reviewers using the kappa statistics.[29] A  
4 Cohen kappa coefficient ( $\kappa$  value) of 0.41-0.60 indicates moderate agreement, 0.61-0.80 indicates  
5 substantial agreement, and 0.81-1.00 is almost perfect agreement.[29]  $\kappa$  value  $>0.61$  will be considered  
6 sufficient to proceed.  
7  
8  
9

10 Potential reasons for exclusion will be defined a priori, categorized, recorded, and reported in the scoping  
11 review. The full text of included citations will then be assessed in detail against the inclusion criteria by two  
12 independent reviewers. Any disagreements that arise during the selection process will be resolved through  
13 discussion and consensus between reviewers, and if needed, with a third party.[23] The results of the  
14 search and the study inclusion process will be reported in full and presented in a Preferred Reporting Items  
15 for Systematic Reviews and Meta-analyses extension for scoping review (PRISMA-ScR) flow diagram.[24]  
16  
17  
18

### 19 **Data Extraction**

20  
21  
22 Data will be extracted from papers using a data extraction tool based on JBI's data extraction form template  
23 (Appendix II).[30] The data extracted will include specific details about the country, authors, participants,  
24 concept, context, study methods, and key findings relevant to the review question.  
25  
26  
27

28 Two reviewers will pilot test the draft extraction form through a calibration exercise to guide the selection of  
29 evidence sources to ensure the form captures all relevant data. They will then extract data independently  
30 from included studies into the draft. The draft data extraction tool will be modified and revised as necessary.  
31 Any modifications will be detailed in the scoping review. Any disagreements that arise between the  
32 reviewers will be resolved through discussion, or with an additional reviewer. If appropriate, authors of  
33 papers will be contacted to request missing or additional data where required.  
34  
35  
36  
37

### 38 **Risk of bias**

39  
40 In accordance with JBI method for scoping reviews, no quality appraisal will be conducted.[23] Rather than  
41 engaging in formal quality assessments, we will assign a level of evidence rating to each study based on  
42 JBI's well-established categorization of studies.  
43  
44  
45

### 46 **Data Analysis and Presentation**

47  
48 We will summarize data quantitatively (using frequencies) and qualitatively (using the descriptive-analytical  
49 method). If possible, we will stratify results by the economic status of the country (e.g., low-, middle-, or  
50 high-income country), ethnicity/race, and health context (e.g., primary, secondary, and tertiary care). Data  
51 will be presented in diagrammatic or tabular form. A narrative summary will accompany the tables and  
52 charts and will describe how the results relate to the review objective and question. Our results will be  
53  
54  
55  
56  
57  
58  
59  
60



1  
2  
3 reported using the Preferred Reporting Items for Systematic reviews and Meta-Analyses extension for  
4 Scoping Reviews (PRISMA-ScR) checklist.  
5  
6

### 7 **Patient and public involvement**

8  
9 It might not be appropriate or possible to involve patients or the public in the design, conduct, reporting  
10 and dissemination plans of our review. However, a patient advisory group will be involved in translating  
11 evidence from the review into co-creating a patient-centered tool for self-management of UI in the context  
12 of a larger study.  
13  
14  
15

### 16 **Ethics and dissemination**

17  
18 The review does not require ethics approval. Findings will be disseminated through presentations at  
19 conferences/workshops, peer-reviewed publication, health blogs, and other social media platforms such as  
20 LinkedIn, Twitter, and Instagram.  
21  
22  
23

### 24 **Copyright/license for publication**

25  
26  
27 "The Corresponding Author has the right to grant on behalf of all authors and does grant on behalf of all  
28 authors, a worldwide licence to the Publishers and its licensees in perpetuity, in all forms, formats and  
29 media (whether known now or created in the future), to i) publish, reproduce, distribute, display and store  
30 the Contribution, ii) translate the Contribution into other languages, create adaptations, reprints, include  
31 within collections and create summaries, extracts and/or, abstracts of the Contribution, iii) create any other  
32 derivative work(s) based on the Contribution, iv) to exploit all subsidiary rights in the Contribution, v) the  
33 inclusion of electronic links from the Contribution to third party material where-ever it may be located; and,  
34 vi) licence any third party to do any or all of the above."  
35  
36  
37  
38

39 **Acknowledgement:** This review contributes towards a PhD degree award for OO.

40  
41 **Authors' contributions:** OO and AW contributed to the conceptualization, design, literature search,  
42 manuscript writing and manuscript editing. JK developed the search strategy, conducted the searches, and  
43 contributed to manuscript writing. WG contributed to the literature search, manuscript review and editing.  
44 All authors approved the final manuscript.  
45  
46

47 **Funding statement:** The review has received no specific grant from any funding agency in the public,  
48 commercial or not-for-profit sectors.  
49  
50

51 **Competing interest statement:** The authors have no competing interests to declare.  
52

53 **Patient consent for publication:** Not required.  
54  
55  
56  
57

**REFERENCES**

1. D'Ancona C, Haylen B, Oelke M, Abranches-Monteiro L, Arnold E, Goldman H, et al. The International Continence Society (ICS) report on the terminology for adult male lower urinary tract and pelvic floor symptoms and dysfunction. *Neurourol Urodyn*. 2019;38(2):433–77.
2. The Canadian Continence Foundation. The Impact of Incontinence in Canada. A briefing document for policy makers [Internet]. 2014. Available from: <https://www.canadiancontinence.ca/pdfs/en-impact-of-incontinence-in-canada-2014.pdf>
3. Coyne KS, Wein A, Nicholson S, Kvasz M, Chen CI, Milsom I. Economic burden of urgency urinary incontinence in the United States: a systematic review. *J Manag Care Pharm JMCP*. 2014;20(2):130–40.
4. Wagg A. Male Overactive Bladder: Underappreciated, Under-researched. More Please? *Eur Urol*. 2021;79(4):505–6.
5. Abrams P, Cardozo L, Wagg A, Wein A. (Eds). *Incontinence*. Vol. 1. Bristol UK: ICI-ICS. International Continence Society; 2017. 35–36 p.
6. Herschorn S, Gajewski J, Schulz J, Corcos J. A population-based study of urinary symptoms and incontinence: the Canadian Urinary Bladder Survey. *BJU Int*. 2007;22(5):52–8.
7. Anger JT, Saigal CS, Stothers L, Thom DH, Rodríguez LV, Litwin MS, et al. The prevalence of urinary incontinence among community dwelling men: results from the National Health and Nutrition Examination survey. *J Urol*. 2006;176(5):2103–8; discussion 2108.
8. Shamliyan TA, Wyman JF, Ping R, Wilt TJ, Kane RL. Male urinary incontinence: prevalence, risk factors, and preventive interventions. *Rev Urol*. 2009;11(3):145–65.
9. Irwin DE, Milsom I, Hunkskaar S, Reilly K, Kopp Z, Herschorn S, et al. Population-based survey of urinary incontinence, overactive bladder, and other lower urinary tract symptoms in five countries: results of the EPIC study. *Eur Urol*. 2006;50(6):1306–14; discussion 1314–1315.
10. Chung E, Katz DJ, Love C. Adult male stress and urge urinary incontinence - A review of pathophysiology and treatment strategies for voiding dysfunction in men. *Aust Fam Physician*. 2017;46(9):661–6.

- 1  
2  
3 11. Abrams P, Cardozo L, Khoury S, Wein A, editors. INCONTINENCE [Internet]. 5th ed. 2013. Available  
4  
5 from: [https://www.ics.org/Publications/ICI\\_5/INCONTINENCE.pdf](https://www.ics.org/Publications/ICI_5/INCONTINENCE.pdf)  
6
- 7 12. Fernández-Cuadros ME, Nieto-Blasco J, Geanini-Yagüez A, Ciprián-Nieto D, Padilla-Fernández B,  
8  
9 Lorenzo-Gómez MF. Male Urinary Incontinence: Associated Risk Factors and Electromyography  
10  
11 Biofeedback Results in Quality of Life. *Am J Mens Health*. 2016;10(6):NP127–35.  
12
- 13 13. Grady PA, Gough LL. Self-management: a comprehensive approach to management of chronic  
14  
15 conditions. *Am J Public Health*. 2014;104(8):e25-31.  
16
- 17 14. Tannenbaum C, van den Heuvel E, Fritel X, Southall K, Jutai J, Rajabali S, et al. Continence Across  
18  
19 Continents To Upend Stigma and Dependency (CACTUS-D): study protocol for a cluster  
20  
21 randomized controlled trial. *Trials*. 2015;16(1):565.  
22
- 23 15. Holroyd-Leduc JM, Straus S, Thorpe K, Davis DA, Schmaltz H, Tannenbaum C. Translation of  
24  
25 evidence into a self-management tool for use by women with urinary incontinence†. *Age Ageing*.  
26  
27 2011;40(2):227–33.  
28
- 29 16. Albarqouni L, Sanders S, Clark J, Tikkinen KAO, Glasziou P. Self-Management for Men With Lower  
30  
31 Urinary Tract Symptoms: A Systematic Review and Meta-Analysis. *Ann Fam Med*.  
32  
33 2021;19(2):157–67.  
34
- 35 17. Brown CT, Yap T, Cromwell DA, Rixon L, Steed L, Mulligan K, et al. Self management for men with  
36  
37 lower urinary tract symptoms: randomised controlled trial. *BMJ*. 2007 6;334(7583):25.  
38
- 39 18. Brown CT, van der Meulen J, Mundy AR, O'Flynn E, Emberton M. Defining the components of a self-  
40  
41 management programme for men with uncomplicated lower urinary tract symptoms: a consensus  
42  
43 approach. *Eur Urol*. 2004;46(2):254–62; discussion 263.  
44
- 45 19. Shah D, Badlani G. Treatment of overactive bladder and incontinence in the elderly. *Rev Urol*. 2002;4  
46  
47 Suppl 4:S38-43.  
48
- 49 20. Abrams P, Cardozo L, Fall M, Griffiths D, Rosier P, Ulmsten U, et al. The standardisation of  
50  
51 terminology of lower urinary tract function: report from the Standardisation Sub-committee of the  
52  
53 International Continence Society. *Neurourol Urodyn*. 2002;21(2):167–78.  
54
- 55 21. EUPATI Open Classroom. RISK FACTORS IN HEALTH AND DISEASE [Internet]. [cited 2022 Aug  
56  
57 17]. Available from: <https://learning.eupati.eu/mod/book/view.php?id=215>  
58  
59  
60

- 1  
2  
3 22. Cancer Care Ontario, Prevention and Cancer Control (Population Health and Prevention). Modifiable  
4 Risk Factors [Internet]. Available from: [https://www.cancercareontario.ca/en/data-research/view-](https://www.cancercareontario.ca/en/data-research/view-data/modifiable-risk-factors)  
5  
6 [data/modifiable-risk-factors](https://www.cancercareontario.ca/en/data-research/view-data/modifiable-risk-factors)  
7  
8  
9 23. Peters M, Godfrey C, Mclnerney P, Munn Z, Trico A, Khalil H. Chapter 11: Scoping Reviews. In:  
10 Aromataris E, Munn Z, editors. JBI Manual for Evidence Synthesis [Internet]. JBI; 2020 [cited  
11 2022 Sep 27]. Available from:  
12  
13 <https://wiki.jbi.global/display/MANUAL/Chapter+11%3A+Scoping+reviews>  
14  
15  
16 24. Tricco AC, Lillie E, Zarin W, O'Brien KK, Colquhoun H, Levac D, et al. PRISMA Extension for  
17 Scoping Reviews (PRISMA-ScR): Checklist and Explanation. *Ann Intern Med.* 2018;169(7):467–  
18  
19 73.  
20  
21  
22 25. McGowan J, Sampson M, Salzwedel DM, Cogo E, Foerster V, Lefebvre C. PRESS Peer Review of  
23 Electronic Search Strategies: 2015 Guideline Statement. *J Clin Epidemiol.* 2016;75:40–6.  
24  
25  
26 26. Haddaway NR, Collins AM, Coughlin D, Kirk S. The Role of Google Scholar in Evidence Reviews and  
27 Its Applicability to Grey Literature Searching. Wray KB, editor. *PLOS ONE.* 2015;10(9):e0138237.  
28  
29  
30 27. Work on Grey in Progress. 6th International Conference on Grey Literature [Internet]. TextRelease;  
31 Amsterdam; 2004. Available from:  
32  
33 ([http://greyguide.isti.cnr.it/attachments/category/30/GL6\\_Conference\\_Proceedings.pdf](http://greyguide.isti.cnr.it/attachments/category/30/GL6_Conference_Proceedings.pdf))  
34  
35  
36 28. Covidence systematic review software [Internet]. Melbourne, Australia: Veritas Health Innovation;  
37 Available from: [www.covidence.org](http://www.covidence.org)  
38  
39  
40 29. McHugh ML. Interrater reliability: the kappa statistic. *Biochem Medica.* 2012;22(3):276–82.  
41  
42  
43 30. JBI Data Extraction Form for Review for Systematic Reviews and Research Syntheses [Internet].  
44 BMJ Open; [cited 2022 Jun 15]. Available from:  
45  
46 [https://bmjopen.bmj.com/content/bmjopen/9/7/e029811/DC3/embed/inline-supplementary-](https://bmjopen.bmj.com/content/bmjopen/9/7/e029811/DC3/embed/inline-supplementary-material-3.pdf?download=true)  
47 [material-3.pdf?download=true](https://bmjopen.bmj.com/content/bmjopen/9/7/e029811/DC3/embed/inline-supplementary-material-3.pdf?download=true)  
48  
49  
50  
51  
52  
53  
54  
55  
56  
57  
58  
59  
60

**PRISMA-P (Preferred Reporting Items for Systematic review and Meta-Analysis Protocols) 2015 checklist: recommended items to address in a systematic review protocol**

| Section and topic                 | Item No | Checklist item                                                                                                                                                                                  | Information reported |     | Page number(s) |
|-----------------------------------|---------|-------------------------------------------------------------------------------------------------------------------------------------------------------------------------------------------------|----------------------|-----|----------------|
|                                   |         |                                                                                                                                                                                                 | Yes                  | N/A |                |
| <b>ADMINISTRATIVE INFORMATION</b> |         |                                                                                                                                                                                                 |                      |     |                |
| Title:                            |         |                                                                                                                                                                                                 |                      |     |                |
| Identification                    | 1a      | Identify the report as a protocol of a systematic review                                                                                                                                        | X                    |     | 2<br>Abstract  |
| Update                            | 1b      | If the protocol is for an update of a previous systematic review, identify as such                                                                                                              |                      | X   |                |
| Registration                      | 2       | If registered, provide the name of the registry (such as PROSPERO) and registration number                                                                                                      | X                    |     | 2<br>Abstract  |
| Authors:                          |         |                                                                                                                                                                                                 |                      |     |                |
| Contact                           | 3a      | Provide name, institutional affiliation, e-mail address of all protocol authors; provide physical mailing address of corresponding author                                                       | X                    |     | 1              |
| Contributions                     | 3b      | Describe contributions of protocol authors and identify the guarantor of the review                                                                                                             | X                    |     | 9              |
| Amendments                        | 4       | If the protocol represents an amendment of a previously completed or published protocol, identify as such and list changes; otherwise, state plan for documenting important protocol amendments |                      | X   |                |
| Support:                          |         |                                                                                                                                                                                                 |                      |     |                |
| Sources                           | 5a      | Indicate sources of financial or other support for the review                                                                                                                                   |                      | X   |                |
| Sponsor                           | 5b      | Provide name for the review funder and/or sponsor                                                                                                                                               |                      | X   |                |
| Role of sponsor or funder         | 5c      | Describe roles of funder(s), sponsor(s), and/or institution(s), if any, in developing the protocol                                                                                              |                      | X   |                |
| <b>INTRODUCTION</b>               |         |                                                                                                                                                                                                 |                      |     |                |
| Rationale                         | 6       | Describe the rationale for the review in the context of what is already known                                                                                                                   | X                    |     | 4-5            |

|                         |     |                                                                                                                                                                                                                               |   |          |
|-------------------------|-----|-------------------------------------------------------------------------------------------------------------------------------------------------------------------------------------------------------------------------------|---|----------|
| Objectives              | 7   | Provide an explicit statement of the question(s) the review will address with reference to participants, interventions, comparators, and outcomes (PICO)                                                                      | X | 5-6      |
| <b>METHODS</b>          |     |                                                                                                                                                                                                                               |   |          |
| Eligibility criteria    | 8   | Specify the study characteristics (such as PICO, study design, setting, time frame) and report characteristics (such as years considered, language, publication status) to be used as criteria for eligibility for the review | X | 5-6      |
| Information sources     | 9   | Describe all intended information sources (such as electronic databases, contact with study authors, trial registers or other grey literature sources) with planned dates of coverage                                         | X | 7        |
| Search strategy         | 10  | Present draft of search strategy to be used for at least one electronic database, including planned limits, such that it could be repeated                                                                                    | X | Appendix |
| Study records:          |     |                                                                                                                                                                                                                               |   |          |
| Data management         | 11a | Describe the mechanism(s) that will be used to manage records and data throughout the review                                                                                                                                  | X | 7        |
| Selection process       | 11b | State the process that will be used for selecting studies (such as two independent reviewers) through each phase of the review (that is, screening, eligibility and inclusion in meta-analysis)                               | X | 7        |
| Data collection process | 11c | Describe planned method of extracting data from reports (such as piloting forms, done independently, in duplicate), any processes for obtaining and confirming data from investigators                                        | X | 8        |
| Data items              | 12  | List and define all variables for which data will be sought (such as PICO items, funding sources), any pre-planned data assumptions and simplifications                                                                       | X | 5-6      |

|                                    |     |                                                                                                                                                                                                                                                  |   |   |
|------------------------------------|-----|--------------------------------------------------------------------------------------------------------------------------------------------------------------------------------------------------------------------------------------------------|---|---|
| Outcomes and prioritization        | 13  | List and define all outcomes for which data will be sought, including prioritization of main and additional outcomes, with rationale                                                                                                             | X |   |
| Risk of bias in individual studies | 14  | Describe anticipated methods for assessing risk of bias of individual studies, including whether this will be done at the outcome or study level, or both; state how this information will be used in data synthesis                             | X | 8 |
| Data synthesis                     | 15a | Describe criteria under which study data will be quantitatively synthesised                                                                                                                                                                      | X | 8 |
|                                    | 15b | If data are appropriate for quantitative synthesis, describe planned summary measures, methods of handling data and methods of combining data from studies, including any planned exploration of consistency (such as $I^2$ , Kendall's $\tau$ ) | X | 8 |
|                                    | 15c | Describe any proposed additional analyses (such as sensitivity or subgroup analyses, meta-regression)                                                                                                                                            | X |   |
|                                    | 15d | If quantitative synthesis is not appropriate, describe the type of summary planned                                                                                                                                                               | X | 8 |
| Meta-bias(es)                      | 16  | Specify any planned assessment of meta-bias(es) (such as publication bias across studies, selective reporting within studies)                                                                                                                    | X |   |
| Confidence in cumulative evidence  | 17  | Describe how the strength of the body of evidence will be assessed (such as GRADE)                                                                                                                                                               | X | 8 |

From: Shamseer L, Moher D, Clarke M, Ghersi D, Liberati A, Petticrew M, Shekelle P, Stewart L, PRISMA-P Group. Preferred reporting items for systematic review and meta-analysis protocols (PRISMA-P) 2015: elaboration and explanation. *BMJ*. 2015. doi: <https://doi.org/10.1136/bmj.g7647>

## APPENDICES

### Appendix I: Search strategy

Ovid MEDLINE(R) ALL <1946 to May 24, 2022>

|    |                                                                                                                                                                                     |           |
|----|-------------------------------------------------------------------------------------------------------------------------------------------------------------------------------------|-----------|
| 1  | exp Male/ and exp Aged/                                                                                                                                                             | 2,684,034 |
| 2  | exp Aging/ and exp Male/                                                                                                                                                            | 135,117   |
| 3  | exp Male/ and exp "Aged, 80 and over"/                                                                                                                                              | 850,025   |
| 4  | exp Geriatrics/ and exp Male/                                                                                                                                                       | 4,724     |
| 5  | ((older or ag?ing or aged or senior* or elder* or gerontolog* or geriatric* or "old age") adj3 (male* or man or men)).mp.                                                           | 105,120   |
| 6  | (men over adj ("60" or "65" or "70" or "75" or "80" or "85" or "90")).mp.                                                                                                           | 414       |
| 7  | (male* over adj ("60" or "65" or "70" or "75" or "80" or "85" or "90")).mp.                                                                                                         | 148       |
| 8  | or/1-7                                                                                                                                                                              | 2,807,887 |
| 9  | exp Urinary Incontinence/                                                                                                                                                           | 35,150    |
| 10 | ((urin* or bladder) adj2 (incontinen* or continen*)).mp.                                                                                                                            | 48,546    |
| 11 | exp Urinary Bladder, Overactive/                                                                                                                                                    | 5,510     |
| 12 | ((overactiv* or hyper* or detrusor or vesic*) adj2 bladder).mp.                                                                                                                     | 11,440    |
| 13 | (bladder* adj2 (neuropath* or neurogen* or neurolog*)).mp.                                                                                                                          | 10,343    |
| 14 | ((bladder or detrusor or vesic*) adj5 (instability or stab* or unstable or irritab* or hyperreflexia or dys?ynerg* or dyskinesi* or irritat*)).mp.                                  | 6,390     |
| 15 | (nervous adj1 (pollakisur* or pollakiur*)).mp.                                                                                                                                      | 5         |
| 16 | or/9-15                                                                                                                                                                             | 67,490    |
| 17 | exp Risk Factors/                                                                                                                                                                   | 926,730   |
| 18 | risk*.ti. or risk factor*.ab. /freq=3                                                                                                                                               | 613,850   |
| 19 | (predict* or cause*).ti. or ((modifiable or behavio?r* or contribut* or transient* or adjust* or temporar* or chang* or adapt* or alter*) adj3 (factor* or predict* or cause*)).mp. | 1,005,389 |
| 20 | relative risk*.mp.                                                                                                                                                                  | 86,221    |
| 21 | or/17-20                                                                                                                                                                            | 2,172,971 |
| 22 | 8 and 16 and 21                                                                                                                                                                     | 1,662     |



**Appendix II: Data extraction form**

|                                            |  |
|--------------------------------------------|--|
| <b>Study details</b>                       |  |
| Author/Year                                |  |
| Objectives                                 |  |
| Participants (characteristics/total number |  |
| Setting/context                            |  |
| Phenomena of interest                      |  |
| <b>Search details</b>                      |  |
| Sources searched                           |  |
| Range (yrs) of included studies            |  |
| Number of studies included                 |  |
| Types of studies included                  |  |
| Country of origin of included studies      |  |
| <b>Analysis</b>                            |  |
| Method of analysis                         |  |
| <b>Results/Findings</b>                    |  |
| Significance/ Direction                    |  |
| Heterogeneity                              |  |
| Comments                                   |  |
