# Supplementary material for: Urinary incontinence in older men: protocol for a scoping review of risk factors
Source: PubMed Central journal article supplement — BMJ Open. 2023 Feb 10;13(2):e068956. doi: 10.1136/bmjopen-2022-068956 (PMC9923276; doi:10.1136/bmjopen-2022-068956), 2023-02-10
Supplement: bmjopen-2022-068956supp001.pdf [file bmjopen-2022-068956supp001.pdf]

**APPENDICES****Appendix I: Search strategy**

Ovid MEDLINE(R) ALL &lt;1946 to May 24, 2022&gt;

|    |                                                                                                                                                                                     |           |
|----|-------------------------------------------------------------------------------------------------------------------------------------------------------------------------------------|-----------|
| 1  | exp Male/ and exp Aged/                                                                                                                                                             | 2,684,034 |
| 2  | exp Aging/ and exp Male/                                                                                                                                                            | 135,117   |
| 3  | exp Male/ and exp "Aged, 80 and over"/                                                                                                                                              | 850,025   |
| 4  | exp Geriatrics/ and exp Male/                                                                                                                                                       | 4,724     |
| 5  | ((older or ag?ing or aged or senior* or elder* or gerontolog* or geriatric* or "old age") adj3 (male* or man or men)).mp.                                                           | 105,120   |
| 6  | (men over adj ("60" or "65" or "70" or "75" or "80" or "85" or "90")).mp.                                                                                                           | 414       |
| 7  | (male* over adj ("60" or "65" or "70" or "75" or "80" or "85" or "90")).mp.                                                                                                         | 148       |
| 8  | or/1-7                                                                                                                                                                              | 2,807,887 |
| 9  | exp Urinary Incontinence/                                                                                                                                                           | 35,150    |
| 10 | ((urin* or bladder) adj2 (incontinen* or continen*)).mp.                                                                                                                            | 48,546    |
| 11 | exp Urinary Bladder, Overactive/                                                                                                                                                    | 5,510     |
| 12 | ((overactiv* or hyper* or detrusor or vesic*) adj2 bladder).mp.                                                                                                                     | 11,440    |
| 13 | (bladder* adj2 (neuropath* or neurogen* or neurolog*)).mp.                                                                                                                          | 10,343    |
| 14 | ((bladder or detrusor or vesic*) adj5 (instability or stab* or unstable or irritab* or hyperreflexia or dys?ynerg* or dyskinesi* or irritat*)).mp.                                  | 6,390     |
| 15 | (nervous adj1 (pollakisur* or pollakiur*)).mp.                                                                                                                                      | 5         |
| 16 | or/9-15                                                                                                                                                                             | 67,490    |
| 17 | exp Risk Factors/                                                                                                                                                                   | 926,730   |
| 18 | risk*.ti. or risk factor*.ab. /freq=3                                                                                                                                               | 613,850   |
| 19 | (predict* or cause*).ti. or ((modifiable or behavio?r* or contribut* or transient* or adjust* or temporar* or chang* or adapt* or alter*) adj3 (factor* or predict* or cause*)).mp. | 1,005,389 |
| 20 | relative risk*.mp.                                                                                                                                                                  | 86,221    |
| 21 | or/17-20                                                                                                                                                                            | 2,172,971 |
| 22 | 8 and 16 and 21                                                                                                                                                                     | 1,662     |

**Appendix II: Data extraction form**

|                                            |  |
|--------------------------------------------|--|
| <b>Study details</b>                       |  |
| Author/Year                                |  |
| Objectives                                 |  |
| Participants (characteristics/total number |  |
| Setting/context                            |  |
| Phenomena of interest                      |  |
| <b>Search details</b>                      |  |
| Sources searched                           |  |
| Range (yrs) of included studies            |  |
| Number of studies included                 |  |
| Types of studies included                  |  |
| Country of origin of included studies      |  |
| <b>Analysis</b>                            |  |
| Method of analysis                         |  |
| <b>Results/Findings</b>                    |  |
| Significance/ Direction                    |  |
| Heterogeneity                              |  |
| Comments                                   |  |
